# Supplementary material for: Efficient log P determination by automated, spatially encoded 19 F NMR spectroscopy
Source: Royal Society of Chemistry journal article supplement (doi:10.1039/d5md00678c), 2026-01-01
Supplement: d5md00678c1.pdf [file d5md00678c1.pdf]

*Efficient LogP determination by automated, spatially encoded  $^{19}\text{F}$  NMR Spectroscopy: Wood, Gordon, Stein, Howard and Parkinson*

## Efficient LogP determination by automated, spatially encoded $^{19}\text{F}$ NMR Spectroscopy

Susanna H. Wood<sup>a\*</sup>, Fiona Gordon<sup>a</sup>, Robin S. Stein<sup>b</sup>, Mark J. Howard<sup>b</sup> and John A. Parkinson<sup>a</sup>

<sup>a</sup>Department of Pure and Applied Chemistry, University of Strathclyde, Thomas Graham Building, 295 Cathedral Street, Glasgow, G1 1XL, UK

<sup>b</sup>Bruker (UK) Ltd., Welland House, Westwood Business Park, Longwood Close, Coventry CV4 8HZ, UK

### SUPPORTING INFORMATION

\*Corresponding Author:

Dr. Susanna H. Wood [susanna.h.wood@strath.ac.uk](mailto:susanna.h.wood@strath.ac.uk)

#### Table of Contents

|                                                                                                 |    |
|-------------------------------------------------------------------------------------------------|----|
| 1.0 Method Development .....                                                                    | 2  |
| 1.1 Principle .....                                                                             | 2  |
| 1.2 Evaluating the extent of deviation of NMR response from ideal .....                         | 2  |
| 1.3 NMR lineshape considerations .....                                                          | 7  |
| 1.4 n-Octanol/water bilayer samples, lineshape, deuterium lock and deuterium lock adjustment .. | 7  |
| 1.5 Initial logP measurements .....                                                             | 10 |
| 1.6 Signal-to-noise considerations when measuring logP .....                                    | 11 |
| 1.7 LogP Measurements .....                                                                     | 12 |
| 1.8 Pulse sequences for measuring logP by $^{19}\text{F}$ NMR with spatial encoding .....       | 17 |
| 1.9 Trial procedures and testing .....                                                          | 20 |
| 1.10 Automated measurement on Bruker AVANCE and AVANCE NEO systems under IconNMR....            | 22 |
| 1.11 Code.....                                                                                  | 26 |
| 2.0 References .....                                                                            | 42 |

## 1.0 Method Development

Development of the final version of the procedure reported in this article was through several stages. For transparency, these stages are described.

### 1.1 Principle

NMR spectroscopy is quantitative under carefully controlled conditions. The ratio of integrals for NMR signals of a compound partitioned between water and n-octanol within the same sample volume should lead directly to log*P* according to Equation 1. Here, integral ratio is directly related to the ratio of solute in upper (organic) and lower (aqueous) solvent layers with equilibrium partitioning of the solute:

$$\log P = \log \frac{[\text{Solute in Octan} - 1 - \text{ol}]}{[\text{Solute in Water}]} = \log \frac{\text{Integral of Octan} - 1 - \text{ol Layer Solute NMR Signal}}{\text{Integral of Water Layer Solute NMR Signal}} \quad \text{Eq. 1}$$

For this to hold for absolute quantification, the NMR response to the applied radio frequency (rf) field must be equal in each solvent layer. A radio-frequency pulse or train of pulses should therefore ideally yield the same NMR response in all solute molecules across all solvents within the same NMR tube. For a bilayer sample made of two immiscible solvents, a tuning mismatch occurs due to susceptibility differences between the solvents in use. Such mismatch may alter excitation profiles for solute partitioned into different layers, potentially yielding differences in the resulting integrals and leading to false log*P* values. Assessment of the impact of different samples on NMR probe tuning and signal response was therefore made to understand the potential severity of such differences and inform technique development for general application in an NMR spectroscopy context.

### 1.2 Evaluating the extent of deviation of NMR response from ideal

NMR data were acquired using a standard delay-90°-acquire pulse sequence using partitioned analytes for which the <sup>19</sup>F *T*<sub>1</sub> longitudinal spin-lattice relaxation time constant for each NMR signal was also measured. This ensured that the larger of any <sup>19</sup>F *T*<sub>1</sub> value was used to set the relaxation delay.

Initially, bilayer test samples were created using deuterated chloroform, CDCl<sub>3</sub> (bottom layer) and deuterated water, D<sub>2</sub>O (top layer). This combination had two benefits. Firstly, it avoided the need for solvent suppression to be included into the method during early testing stages when <sup>1</sup>H NMR data were also being collected. Secondly, this solvent combination provided a source of deuterium for the NMR spectrometer <sup>2</sup>H field-frequency lock system. CDCl<sub>3</sub> and D<sub>2</sub>O samples containing the same analyte were also prepared as separate homogeneous NMR samples and analysed independently for reference purposes.

Empirical parameter calibration and setting was achieved using trifluoroethanol,  $\text{CF}_3\text{CH}_2\text{OH}$  (selected as the partitioning solute) and trifluorotoluene,  $\text{C}_6\text{H}_5\text{CF}_3$  (selected as the layer-labelling, hydrophobic solute, used to indicate when the organic layer was the source of the  $^{19}\text{F}$  NMR response (**Figure S1**).

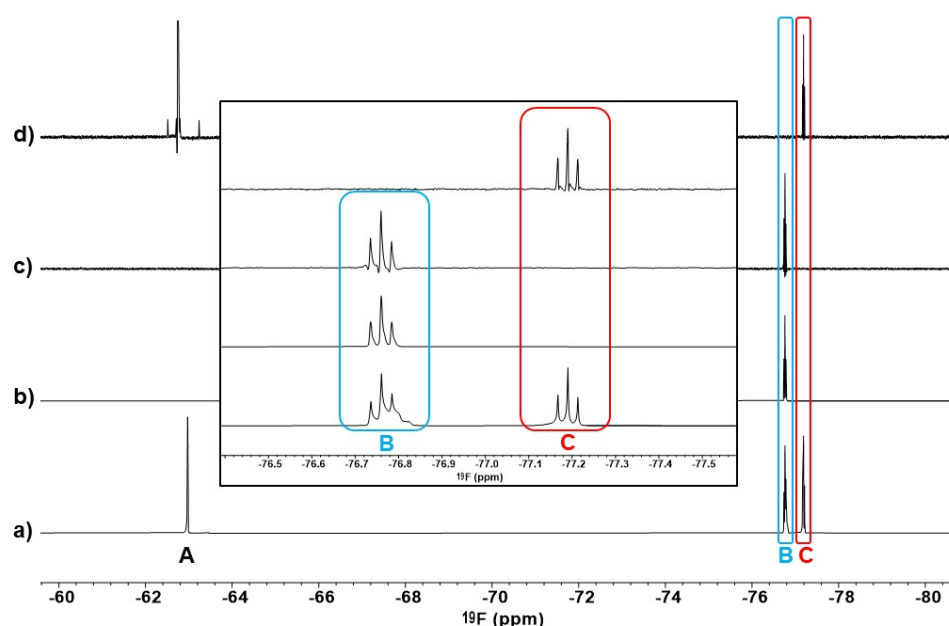

**Figure S1.**  $^{19}\text{F}$  NMR spectra of trifluoroethanol,  $\text{CF}_3\text{CH}_2\text{OH}$  (TFE), and trifluorotoluene,  $\text{C}_6\text{H}_5\text{CF}_3$  (TFT) showing full NMR spectra with [inset] expansions focussed on the triplet  $^{19}\text{F}$  NMR signals from TFE. a) Single pulse-acquire  $^{19}\text{F}$  NMR spectrum of layered  $\text{CDCl}_3/\text{D}_2\text{O}$  sample containing TFE (**B**, **C**) and TFT (**A**). b) Single pulse-acquire  $^{19}\text{F}$  NMR spectrum of a  $\text{D}_2\text{O}$  sample of TFE (**B**). c)  $^{19}\text{F}$  NMR spectrum acquired with spatial encoding selecting for upper  $\text{D}_2\text{O}$  layer (**B**). d)  $^{19}\text{F}$  NMR spectrum with spatial encoding selecting for lower  $\text{CDCl}_3$  layer (**C**). **A**:  $\text{C}_6\text{H}_5\text{CF}_3$  signal from TFT; **B** and boxed: (blue colour code) –  $\text{CF}_3\text{CH}_2\text{OH}$   $^{19}\text{F}$  NMR signal of TFE from upper  $\text{D}_2\text{O}$  layer; **C** and boxed: (red colour code) –  $\text{CF}_3\text{CH}_2\text{OH}$   $^{19}\text{F}$  NMR signal of TFE from lower  $\text{CDCl}_3$  layer. NMR data were acquired at a magnetic field strength of 9.4 T using a two-channel Bruker AVANCE Nanobay NMR spectrometer equipped with a BBFO-z probehead operating at a probehead temperature of 300 K. Acquisition conditions were as follows: 1D  $^{19}\text{F}$  single pulse-acquire data were collected into 65536 data points over a frequency width of 30.05 ppm (11312.2 Hz) for an acquisition time of 2.89 s and centred at  $\delta^{19}\text{F} = -70$  ppm (offset o1 = -26347.30 Hz). Data were acquired with 16 transients and 2 dummy transients with a relaxation delay of 2.0 s. 1D slice-selective  $^{19}\text{F}$  NMR data were acquired using the selective spin-echo pulse sequence shown schematically at **Figure S6a** of this supporting information. Selective excitation  $90^\circ$  (Gaussian 4 Cascade, 1303.33  $\mu\text{s}$  duration) and selective refocussing  $180^\circ$  (Rsnob, 388.67  $\mu\text{s}$  duration) r.f. pulses were applied for a bandwidth of 6 kHz over a 16% z-gradient (8.8 G/cm) with a frequency offset (spoffs) of  $\pm 25$  kHz to select for 1.7 mm thick slices at  $\pm 7$  mm either side of the  $\text{CDCl}_3/\text{D}_2\text{O}$  solvent interface. Data were acquired with 16 transients and 2 dummy transients over a frequency width equivalent to

30 ppm (11312.2 Hz, acquisition time = 2.89 s) into 65536 data points and centred at  $\delta^{19}\text{F} = -70$  ppm ( $\omega_1 = -26348.3$  Hz) with an initial relaxation time  $d1 = 2$  s between each transient. These data are available at <https://doi.org/10.15129/6ca1ffd8-270b-4ede-a3c0-91e083d57e21>.

The expected lower (higher density)  $\text{CDCl}_3$  layer is distinguished by the presence of the TFT  $^{19}\text{F}$  NMR signal in the region  $\delta^{19}\text{F} = -62$  ppm for the bilayered sample (**Figure S1d**). This signal is absent from the reference  $\text{D}_2\text{O}$  sample  $^{19}\text{F}$  NMR spectrum (**Figure S1b**), (since TFT is not in this sample).

These data are notable for two features.

A) Chemical shift difference is observed for resolved  $^{19}\text{F}$  NMR signals for the same solute in different solvents for NMR spectra acquired on the bilayer sample (**Figure S1a**). This is evident in a spectrum acquired across the entire length of the detectable volume of the sample using a single pulse-acquire pulse sequence. Simplistically, this approach might be considered suitable for creating data by which  $\log P$  could be readily determined. Realistically, this assumption fails to address several crucial factors including that chemical shift difference may not be significantly distinct or exist at all for the same solute in different solvent layers. Such an observation would complicate or preclude use of an NMR approach for measuring  $\log P$ .

B) Spatial encoding distinguishes distinct layers within the bilayer sample. The example data clearly reveal this, as shown by the presence of the TFT  $^{19}\text{F}$  NMR signal at  $\delta^{19}\text{F} = -62$  ppm (**Figure S1a** and **Figure S1d**).

Knowledge of the bilayer-origins of each  $^{19}\text{F}$  NMR signal in the  $\text{CDCl}_3$  (TFT/TFT)<sub>Lower</sub>/ $\text{D}_2\text{O}$  (TFT)<sub>Upper</sub> bilayer system was a prerequisite for measuring the NMR response, particularly when considering the size of the response *versus* the strength of the applied r.f. field. Parity in the measured response for the solute partitioned into different physical layers of a bilayer sample requires the r.f. pulse response to be determined for the solute in different solvents when the NMR probehead is optimally tuned. Tuning and matching a specific bilayer sample for  $^{19}\text{F}$  NMR signal observation is achieved as usual by observing a minimum in the Q-curve of the NMR spectrometer tuning response. For this  $\text{CDCl}_3/\text{D}_2\text{O}$  test sample,  $^{19}\text{F}$  NMR spectra were subsequently acquired as an array using a single-pulse-acquire pulse sequence. The r.f. pulse length was arrayed from 2  $\mu\text{s}$  to 62  $\mu\text{s}$  in 2  $\mu\text{s}$  steps at 30 W of power and with a 25 s relaxation delay, adjusted to allow for full recovery of spin magnetization when assuming the longest  $T_1$  relaxation time constant to be 5 s. The results (**Figure S2**) showed evidence of differences in the NMR response depending on which solvent layer the  $^{19}\text{F}$  NMR signal originated from.

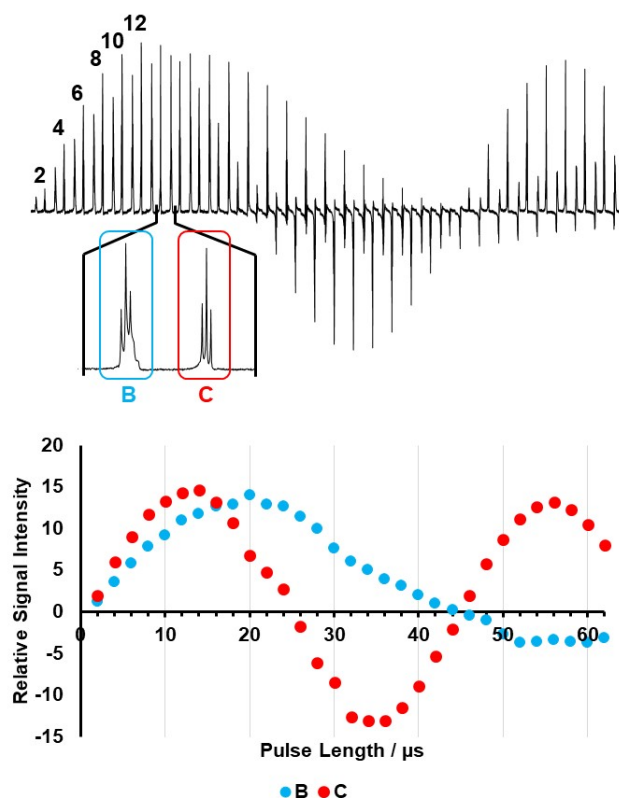

**Figure S2:**  $^{19}\text{F}$  NMR signal response from  $\text{CF}_3\text{CH}_2\text{OH}$  as a function of bilayer solvent. TOP: raw signal response for signal **B** (upper  $\text{D}_2\text{O}$  layer) and signal **C** (lower  $\text{CDCl}_3$  layer) as described in **Figure S1** and shown expanded with colour coded boxes; the same signals are represented at pulse lengths of 2, 4, 6, 8, 10, 12 etc.  $\mu\text{s}$  up to a total of 62  $\mu\text{s}$  in increments of 2  $\mu\text{s}$ . BOTTOM: signal intensities extracted from raw data plotted as a function of pulse length - **red data points** correspond to signal **C**, **blue data points** correspond to signal **B**.

These data show the need for caution. In this instance the lower  $\text{CDCl}_3$  layer yielded a  $90^\circ$  pulse length of 13  $\mu\text{s}$  at 30 W of power. In contrast, the  $^{19}\text{F}$   $90^\circ$  pulse and maximum signal response achieved for the upper  $\text{D}_2\text{O}$  layer occurred at approximately twice this value and closer to 26  $\mu\text{s}$  at 30W of power. Under these conditions, when the maximum  $^{19}\text{F}$  NMR signal response is measured for solute in the lower  $\text{CDCl}_3$  layer, the intensity of the  $^{19}\text{F}$  NMR signal from the same solute in the aqueous layer arises from only a  $45^\circ$  r.f. pulse. The result is detection of only 70% of maximum signal in one layer when 100% of signal is detected in the other layer. A difference like this would significantly affect signal integration and cause such an error in the direct determination of  $\log P$  as to make the method void. The condition suggests a need for the application of a correction factor or recalibration of pulses for each layer with subsequent recording of parallel sets of data for different layers. In principle, the resulting data could then be directly compared. While this was a concern in the method development phase, it would be tedious in practice for general, non-expert application, making the approach less

than accessible for general use. The significant difference in tuning response of  $\text{CDCl}_3$  compared with  $\text{D}_2\text{O}$  was expected to be largely responsible for this difference. For this reason, it was important to make similar assessment of an n-octanol/water bilayer system to determine whether this behaviour would be a deal breaker or not when considering further use of this approach to  $\log P$  measurement. Similar data to that shown in **Figure S2** but from a typical n-octanol/water bilayer sample is shown in **Figure S3**.

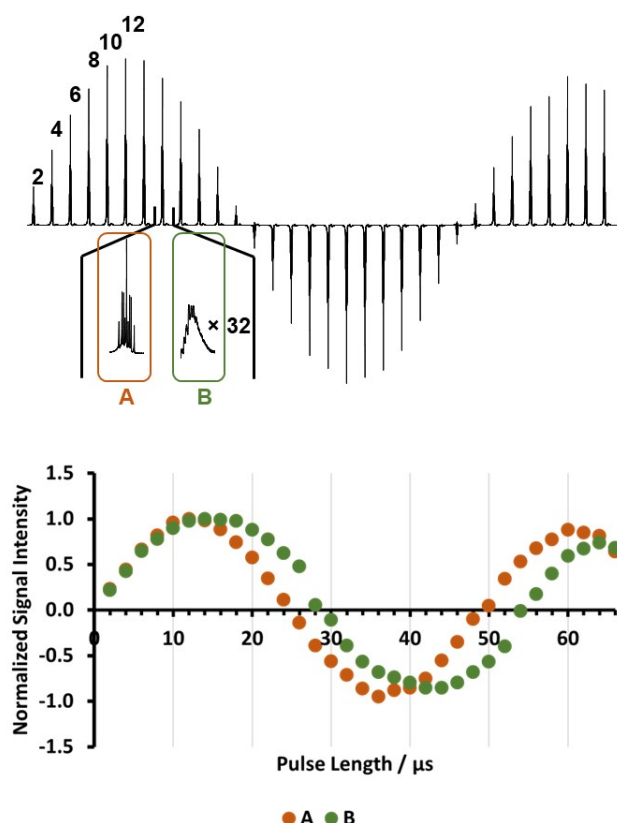

**Figure S3:**  $^{19}\text{F}$  NMR signal responses from Fluoroethanol partitioned between n-octanol and water and acquired at a magnetic field strength of 14.1 T using a -delay-single\_pulse-acquire NMR experiment across the whole of a bilayer n-octanol/water sample as a function pulse length. TOP: raw signal response for signal **A** (upper n-octanol layer) and signal **B** (lower aqueous layer) and shown expanded with colour coded boxes; the same signals are represented at pulse lengths of 2, 4, 6, 8, 10, 12 etc.  $\mu\text{s}$  up to a total of 66  $\mu\text{s}$  in increments of 2  $\mu\text{s}$ . BOTTOM: Normalized  $^{19}\text{F}$  NMR signal intensities extracted from the raw data and plotted as a function of pulse length - **brown data points** correspond to signal **A**, **green data points** correspond to signal **B**.

These measurements revealed a very small difference in the  $^{19}\text{F}$   $90^\circ$  pulse length for responses from n-octanol and water layers of the same sample:  $^{19}\text{F}$   $\text{pw}_{90}(\text{n-octanol}) = 12.5 \mu\text{s}$ ;  $^{19}\text{F}$   $\text{pw}_{90}(\text{water}) = 13.0 \mu\text{s}$ . By calibrating all pulses based on a  $^{19}\text{F}$   $\text{pw}_{90} = 13.0 \mu\text{s}$ , such a difference would result in a pulse

angle of  $86.54^\circ$  rather than  $90^\circ$ , translating into observation of 99.8% rather than 100% of signal. The propagation of this error to any determined  $\log P$  value would show in the third decimal place. In other words, the effect is negligible when the difference in pulse length experienced by analyte in the upper n-octanol layer compare with that experienced by analyte in the lower aqueous layer is of this order. Care should be taken to check such a response by measuring the  $^{19}\text{F}$   $90^\circ$  pulse length of a suitable sample partitioned between n-octanol/water sample on the NMR spectrometer being used. In our experience of implementing the described procedures on several NMR spectrometers, differences in this value, when operating for instance at either 9.4 T using a BBFO-z SmartProbe [iProbe] or at 14.1 T using a H/F-C-N Helium cryoprobe with n-octanol/water partitioned samples, are so minor as to be negligible for all practical purposes of measuring  $\log P$  using this approach.

### 1.3 NMR lineshape considerations

Mixed NMR resonance lineshape is apparent within the data. This can be seen by comparing the  $^{19}\text{F}$  NMR signal of TFE in the  $\text{D}_2\text{O}$  layer of the bilayer sample (**Figure S1a, signal B, inset**) with the same signal for the reference  $\text{D}_2\text{O}$  sample of TFE (**Figure S1b, signal B, inset**) and that of the same NMR signal for the spatially encoded  $^{19}\text{F}$  NMR spectrum when selecting for the upper  $\text{D}_2\text{O}$  layer (**Figure S1c, signal B, inset**). Lineshape is partially a function of magnetic field homogeneity along a sample's length. For a bilayer sample, lineshape distortion as a summation along the whole sample length is anticipated owing to magnetic field inhomogeneity at and approaching the solvent-to-solvent interface. In contrast, the spatially encoded NMR spectrum results from a thin, horizontal sample slice that is distant from the solvent-to-solvent interface, where good to excellent local averaged  $B_0$  homogeneity exists. An advantage of the slice-selective approach is that even when samples are not shimmed (as is the case in this protocol), lineshape is still acceptable in the narrow regions of samples being selected, provided these are distant from the solvent-to-solvent interface. These contrasting data show clearly that integration of signals acquired using a single pulse-acquire approach to NMR data collection for the entire bilayer sample is unsuitable for determining  $\log P$ , thereby underlining the significance of the spatial encoding approach.

### 1.4 n-Octanol/water bilayer samples, lineshape, deuterium lock and deuterium lock adjustment

The adoption of  $^{19}\text{F}$  NMR signal observation for this method arises from the presence of fluorine in many drug molecules and fragment libraries.<sup>1</sup> In contrast to  $^1\text{H}$  NMR,  $^{19}\text{F}$  NMR provides two distinct advantages.

A) The need to handle intense solvent  $^1\text{H}$  NMR signals arising from the n-octanol/water bilayer system is avoided. Such  $^1\text{H}$  NMR signals also occupy key regions of the  $^1\text{H}$  NMR frequency window containing

solute signals, which makes taking a  $^1\text{H}$  NMR approach to measuring  $\log P$  relatively challenging for fully automated measurements.

B) The generation of background-free  $^{19}\text{F}$  NMR data arising from fluorine-labelled solute molecules altogether avoids the need for solvent signal suppression.

Protic solvents (water and n-octanol) mean the absence of deuterium, which is widely used as the source of NMR field/frequency lock. For short duration experiments, this is acceptable. By contrast, long duration experiments (for instance when running samples for extended overnight periods) are subject to magnetic field drift. This generally affects lineshape quality. It is recommended that long duration experiments are carried out on samples that host a sealed capillary containing  $\text{D}_2\text{O}$  to provide the source for an NMR field/frequency lock signal. Such an approach was validated in this work on a mixture of trifluoroethanol,  $\text{CF}_3\text{CH}_2\text{OH}$  (TFE) and hexafluoroisopropanol,  $(\text{CF}_3)_2\text{CHOH}$  (HFIP) for which experimental  $\log P$  values are also known.<sup>2</sup> Spectra from initial studies of this partitioned sample (between n-octanol and water) (**Figure S4**) show some notable features worthy of comment.

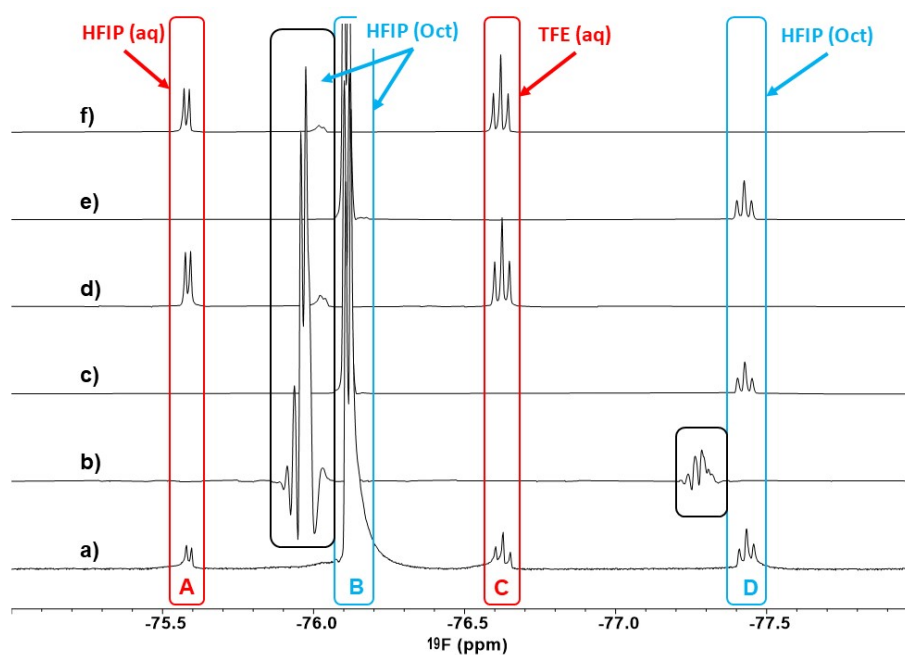

**Figure S4:**  $^{19}\text{F}$  NMR spectra from TFE and HFIP partitioned between n-octanol and water with a  $\text{D}_2\text{O}$  capillary insert. **a)** Single-pulse-acquire spectrum across the entire sample length with sample locked under automated lock conditions. **b)** With spatial encoding and n-octanol layer selection. The deuterium lock is applied using standard parameters for  $\text{D}_2\text{O}$ . The data are displaced horizontally to high frequency by 0.2 ppm with respect to the axis displayed to clearly show signal B but in the **black box**. **c)** With spatial encoding and n-octanol layer selected but with sample unlocked. **d)** With spatial encoding, aqueous layer selected and sample unlocked. **e)** With spatial encoding, n-octanol layer



selected and sample locked with lock parameters adjusted for the capillary in the mixed solvent system. **f)** With spatial encoding, aqueous layer selection and sample locked using optimised lock parameters. See caption to **Figure S1** for experimental details.

The spectrum for the whole sample (**Figure S4a**) shows four signals (two doublets **A** and **B**, and two triplets, **C** and **D**). These arise from two different solute molecules partitioned into two solvent layers. The sample was tuned to  $^{19}\text{F}$  but not shimmed following shimming on a homogeneous  $\text{D}_2\text{O}$  sample run immediately prior to insertion of the bilayer sample into the NMR magnet. With deuterium lock applied, the spatially encoded NMR spectrum on the upper n-octanol layer shows significant lineshape distortion (**Figure S4b**). Association of this lineshape distortion with lock response following application of pulsed field gradients is clear from data acquired when the deuterium lock sweep is switched off and lock power is reduced to zero (**Figures S4c, S4d**). Systematic adjustment of lock loop filter, lock loop gain and lock loop time, carried out to assess their impact on the  $^{19}\text{F}$  NMR lineshape, indicated that reduction of the loop gain value by 20 units from the value read automatically by the spectrometer under automated locking gives acceptable, reproducible  $^{19}\text{F}$  NMR lineshape for locked samples (**Figure 4e** and **4f**). The effects encountered for long duration experiments without field frequency lock are shown for comparison (**Figures S5**).

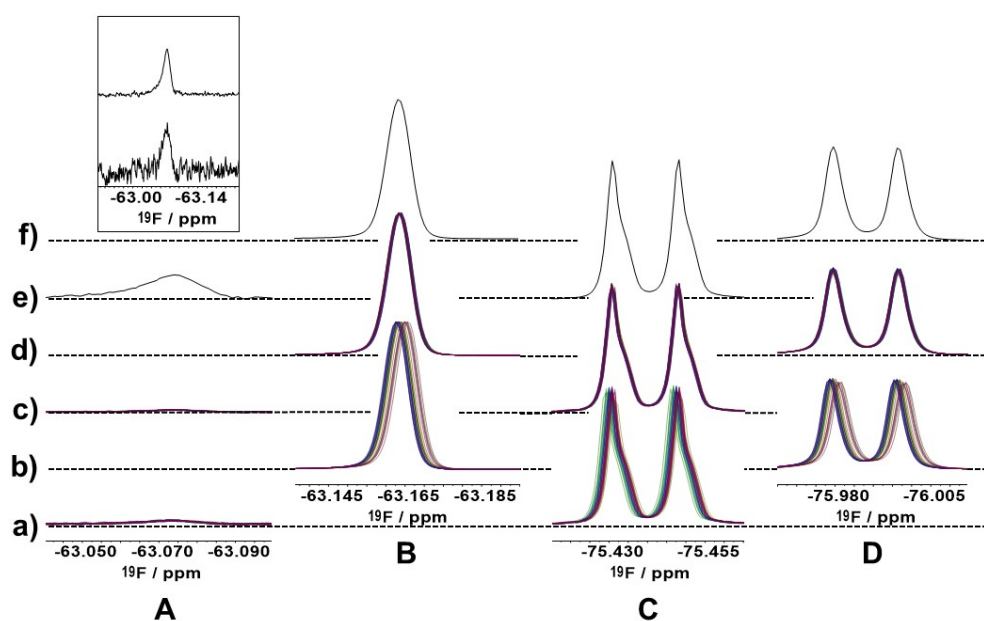

**Figure S5:** Long duration  $^{19}\text{F}$  NMR data acquisition with spatial encoding for unlocked n-octanol/water bilayer sample of trifluorotoluene, TFT,  $\text{CF}_3\text{C}_6\text{H}_5$ , and hexafluoroisopropanol, HFIP,  $(\text{CF}_3)_2\text{CHOH}$ . a) superposition of 32 separate  $^{19}\text{F}$  NMR spectra each acquired with 128 transients, with spatial encoding selecting for lower, aqueous layer; b) as for a) but with spatial encoding selecting for upper n-octanol layer; c) as for a) but following data alignment and removal of outlier spectra

containing degraded signal lineshape; d) as for b) following similar data alignment and equivalent data removal to match the same number of spectra for each sample layer; e) summation of aligned spectra for lower aqueous layer; f) summation of aligned spectra for upper n-octanol layer. **A** - Aqueous layer  $^{19}\text{F}$  NMR signal from TFT; **B** – n-Octanol layer  $^{19}\text{F}$  NMR signal from TFT; **C** - Aqueous layer  $^{19}\text{F}$  NMR signal from HFIP; **D** – n-Octanol layer  $^{19}\text{F}$  NMR signal from HFIP. Inset: Aqueous layer  $^{19}\text{F}$  NMR signal from TFT from 128 transients [lower] and  $128 \times 26$  transients [upper] following alignment and summation of separate, 128 transient  $^{19}\text{F}$  NMR spectra. NMR data were acquired at a magnetic field strength of 9.4 T using a two-channel Bruker AVANCE Nanobay NMR spectrometer equipped with a BBFO-z probehead operating at a temperature of 300 K. For experimental details see caption to **Figure S1** and data availability at <https://doi.org/10.15129/6ca1ffd8-270b-4ede-a3c0-91e083d57e21>

### 1.5 Initial logP measurements

The method was initially operated under manual control of the instrument, allowing validation of the technique in the measurement of a number of fluorinated molecules as shown in **Figure S6**, below.

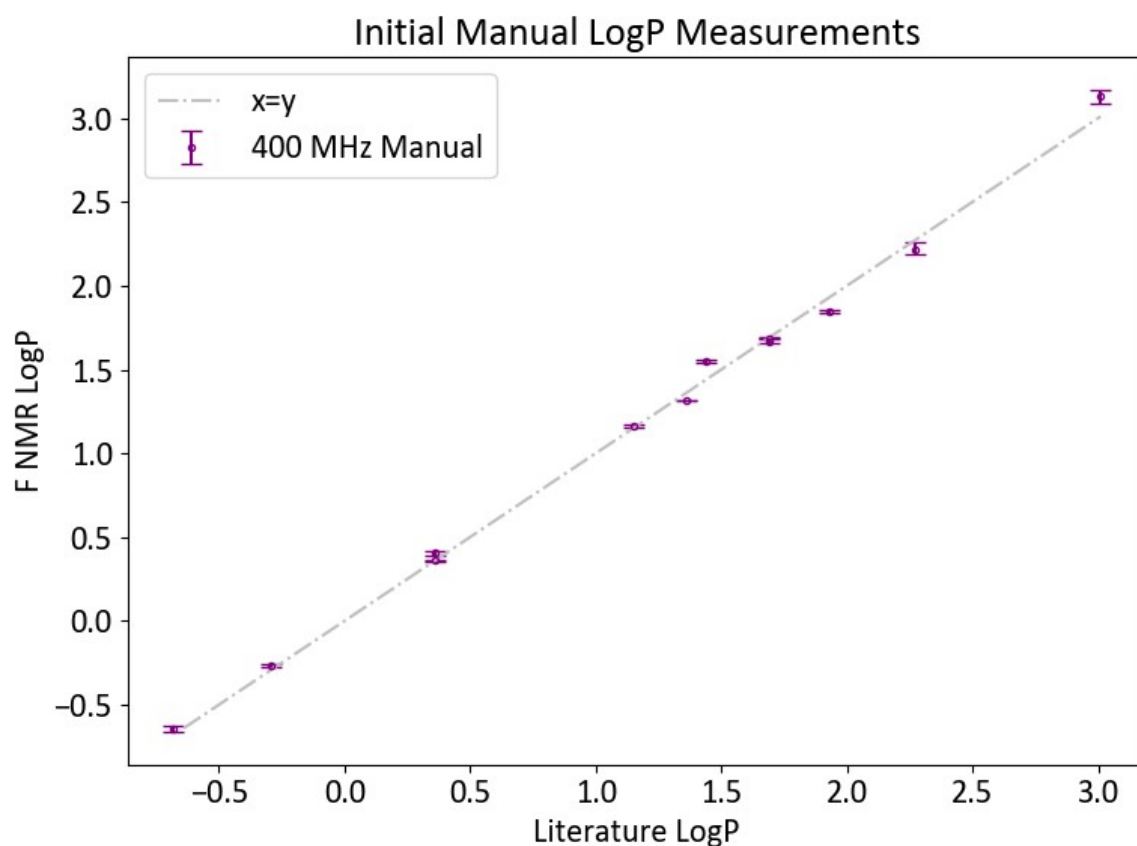

**Figure S6:** Results of logP measurements under manual control.

### 1.6 Signal-to-noise considerations when measuring $\log P$

The stepwise data acquisition described by **Figure S5** led to an assessment of the effects of signal-to-noise on the outcome of  $\log P$  determination. In the context of a significantly different distribution of molecules between solvents, the resulting NMR signal from the most soluble context will have excellent signal-to-noise in contrast to very low signal-to-noise where solute has a low uptake. By aligning and summing different numbers of spectra together from the data reported by **Figure S5**, it was possible to see the effects of improved signal-to-noise on the fit of calculated  $\log P$  with reported values (**Table S1**).

**Table S1:**  $\log P$  for trifluorotoluene, TFT, as a function of  $^{19}\text{F}$  signal-to-noise.

| No. Spectra <sup>a</sup> | NS   | n-Octanol Layer S/N <sup>b</sup> | Water Layer S/N <sup>b</sup> | Integral n-octanol Layer | Integral Water Layer | $\log P$ |
|--------------------------|------|----------------------------------|------------------------------|--------------------------|----------------------|----------|
| 1                        | 128  | 6984.89                          | 2.98                         | 99.922                   | 0.079                | 3.11     |
| 4                        | 512  | 13246.92                         | 6.17                         | 99.924                   | 0.076                | 3.12     |
| 16                       | 2048 | 27390.06                         | 10.99                        | 99.900                   | 0.010                | 3.00     |

<sup>a</sup> $^{19}\text{F}$  NMR spectra were acquired unlocked in blocks of 128 transients using a relaxation delay of 30 s between transients. Other acquisition parameters and conditions are as described previously. Data from each layer were collected separately by frequency offsetting the slice-selective pulses according to the method described in the article text for manual data acquisition. Data from separate layers were processed with 0.3 Hz line broadening and combined by summation from which integrals were measured.

<sup>b</sup>Signal region for the upper n-octanol layer was defined as  $\delta^{19}\text{F} = -63.05$  to  $-63.25$  ppm ( $\Delta\delta = 0.2$  ppm); signal region of the lower aqueous layer was defined as  $\delta^{19}\text{F} = -63.00$  to  $-63.20$  ppm ( $\Delta\delta = 0.2$  ppm); noise region was defined as  $\delta^{19}\text{F} = -69.00$  to  $-70.00$  ppm ( $\Delta\delta = 1.0$  ppm).

The prepared sample was of relatively low concentration (0.05 M) and therefore used to test the limits of sensitivity and the effect this had on the outcome of  $\log P$  determination. By combining spectra, it is possible to see the effects of how doubling the signal-to-noise influences  $\log P$ . With just 128 transients giving a weak response from the  $^{19}\text{F}$  signal from TFT in lower aqueous layer (**Figure S5** inset, lower spectrum), the outcome yields  $\log P = 3.11$ . Doubling the signal-to-noise has little effect on this number and only when a further doubling of the signal-to-noise occurs to yield a value of  $> 10:1$  does the  $\log P$  value come into alignment with the reported literature value of  $\log P = 3.01$ . This sets a minimum threshold for signal-to-noise as around 10:1 as a foundation for more accurate determination of  $\log P$  using this approach.

### 1.7 LogP Measurements

The logP for each measurement was determined and compared by applying a consistent approach to the processing and integration of the NMR spectral data. Line broadening of 5 Hz was applied, the baseline was corrected using TopSpin's automated baseline correction function "abs", each signal was integrated across a 1 ppm chemical shift range, with the signal centred in each case, and the logP calculated from the integral ratio. The error from the measurement was propagated from the signal-to-noise ratio by calculating the maximum and minimum integral associated with this signal-to-noise followed by calculation of the maximum and minimum logP values which could be calculated from these integrals. The results are shown in **Table S2**. The effect of integrating each spectrum separately was compared to integration of the summed spectrum. Integrating each spectrum individually and recording the absolute integrals typically gave advantages in the signal-to-noise, in turn improving confidence in the measurement. LogP derived from integration of the summed spectra (setting the water phase integral to 1 and calculating the logP from the relative integrals) typically deviated from those calculated by integrating the spectra separately by a maximum of 0.05 log units, provided the signal-to-noise in the summed spectrum was above 10:1. The spectra associated with the data presented in **Table S2** are available for download from: <https://doi.org/10.15129/6ca1ffd8-270b-4ede-a3c0-91e083d57e21>

**Table S2:** LogP determination by  $^{19}\text{F}$  NMR and associated Signal-to-Noise

| Compound                   | mmol  | total vol (mL) | Total Conc. (M) | Instrument/probe | NS/expt. time <sup>a</sup> | Integral Water Layer | Integral n-Octanol Layer | Water Layer S/N | n-Octanol Layer S/N | Lit. logP         | Meas. logP | $\Delta\text{lit.}$ | Error (+) | Error (-) |
|----------------------------|-------|----------------|-----------------|------------------|----------------------------|----------------------|--------------------------|-----------------|---------------------|-------------------|------------|---------------------|-----------|-----------|
| 4-Fluoro-aniline           | 0.104 | 0.54           | 0.193           | 400 MHz/BBFO-z   | 28/00:30:17                | 4106038              | 6.2E+07                  | 93.06           | 3163.2              | 1.15 <sup>3</sup> | 1.181      | 0.031               | 0.005     | 0.005     |
| 4-Fluoro-aniline           | 0.104 | 0.54           | 0.193           | 400 MHz/BBFO-z   | 28/00:30:17                | 1                    | 15.5083                  | 70.32           | 2446                | 1.15 <sup>3</sup> | 1.191      | 0.041               | 0.006     | 0.006     |
| 4-Fluoro-aniline           | 0.104 | 0.54           | 0.193           | 600 MHz/He cryo  | 2/00:04:02                 | 3.4E+10              | 4.8E+11                  | 518.73          | 9045.51             | 1.15 <sup>3</sup> | 1.147      | -0.003              | 0.001     | 0.001     |
| 4-Fluoro-aniline           | 0.104 | 0.54           | 0.193           | 600 MHz/He cryo  | 2/00:04:02                 | 1                    | 14.1219                  | 408.04          | 7363.6              | 1.15 <sup>3</sup> | 1.150      | 0.000               | 0.001     | 0.001     |
| 4-Fluoro-phenylacetic acid | 0.106 | 0.54           | 0.196           | 400 MHz/BBFO-z   | 28/00:30:17                | 1720713              | 6.5E+07                  | 40.27           | 3158.53             | 1.44 <sup>3</sup> | 1.579      | 0.139               | 0.011     | 0.011     |
| 4-Fluoro-phenylacetic acid | 0.106 | 0.54           | 0.196           | 400 MHz/BBFO-z   | 28/00:30:17                | 1                    | 39.0627                  | 27.17           | 2265.1              | 1.44 <sup>3</sup> | 1.592      | 0.152               | 0.016     | 0.016     |
| 4-Fluoro-phenylacetic acid | 0.106 | 0.54           | 0.196           | 600 MHz/He cryo  | 2/00:04:02                 | 1.5E+10              | 5E+11                    | 226.79          | 10928.8             | 1.44 <sup>3</sup> | 1.526      | 0.086               | 0.002     | 0.002     |
| 4-Fluoro-phenylacetic acid | 0.106 | 0.54           | 0.196           | 600 MHz/He cryo  | 2/00:04:02                 | 1                    | 33.8807                  | 161.85          | 8018.98             | 1.44 <sup>3</sup> | 1.530      | 0.090               | 0.003     | 0.003     |
| 3-Fluoro-phenol            | 0.116 | 0.40           | 0.290           | 400 MHz/BBFO-z   | 64/01:06:39                | 2485617              | 1.9E+08                  | 90.98           | 4670.98             | 1.93 <sup>3</sup> | 1.883      | -0.047              | 0.005     | 0.005     |
| 3-Fluoro-phenol            | 0.116 | 0.40           | 0.290           | 400 MHz/BBFO-z   | 64/01:06:39                | 1                    | 73.3776                  | 66.91           | 3519.23             | 1.93 <sup>3</sup> | 1.866      | -0.064              | 0.007     | 0.007     |
| 3-Fluoro-phenol            | 0.116 | 0.40           | 0.290           | 600 MHz/He cryo  | 2/00:04:02                 | 1E+10                | 6.5E+11                  | 244             | 14864               | 1.93 <sup>3</sup> | 1.805      | -0.125              | 0.002     | 0.002     |
| 3-Fluoro-                  | 0.116 | 0.40           | 0.290           | 600 MHz/         | 2/                         | 1                    | 63.7972                  | 53.36           | 2901.13             | 1.93 <sup>3</sup> | 1.805      | -0.125              | 0.008     | 0.008     |

|                         |       |      |       |                     |                 |         |         |         |         |                        |        |        |       |       |
|-------------------------|-------|------|-------|---------------------|-----------------|---------|---------|---------|---------|------------------------|--------|--------|-------|-------|
| phenol                  |       |      |       | He cryo             | 00:04:02        |         |         |         |         |                        |        |        |       |       |
| Trifluoro-toluene       | 0.135 | 0.40 | 0.339 | 400 MHz/<br>BBFO-z  | 96/<br>01:43:11 | 667853  | 9.2E+08 | 14.64   | 20483.8 | 3.01 <sup>4</sup>      | 3.139  | 0.129  | 0.031 | 0.029 |
| Trifluoro-toluene       | 0.135 | 0.40 | 0.339 | 400 MHz/<br>BBFO-z  | 96/<br>01:43:11 | 1       | 1261.48 | 10.46   | 14593.8 | 3.01 <sup>4</sup>      | 3.101  | 0.091  | 0.044 | 0.040 |
| Trifluoro-toluene       | 0.135 | 0.40 | 0.339 | 600 MHz/<br>He cryo | 2/<br>00:04:12  | 8.7E+08 | 8.5E+11 | 21.06   | 17812.8 | 3.01 <sup>4</sup>      | 2.990  | -0.020 | 0.021 | 0.020 |
| Trifluoro-toluene       | 0.135 | 0.40 | 0.339 | 600 MHz/<br>He cryo | 2/<br>00:04:12  | 1       | 1074.09 | 11.14   | 11533.9 | 3.01 <sup>4</sup>      | 3.031  | 0.021  | 0.041 | 0.037 |
| Trifluoro-toluene       | 0.013 | 0.54 | 0.024 | 600 MHz/<br>He cryo | 32/<br>00:34:20 | 2.7E+09 | 2.7E+12 | 16.84   | 15027.1 | 3.01 <sup>4</sup>      | 2.999  | -0.011 | 0.027 | 0.025 |
| Trifluoro-toluene       | 0.013 | 0.54 | 0.024 | 600 MHz/<br>He cryo | 32/<br>00:34:20 | 1       | 1106.75 | 11.21   | 9753.56 | 3.01 <sup>4</sup>      | 3.044  | 0.034  | 0.041 | 0.037 |
| Fluoro-ethanol          | 0.097 | 0.54 | 0.179 | 400 MHz/<br>BBFO-z  | 10/<br>00:12:07 | 1.4E+07 | 2800751 | 470.73  | 234.36  | -<br>0.68 <sup>2</sup> | -0.714 | -0.034 | 0.003 | 0.003 |
| Fluoro-ethanol          | 0.097 | 0.54 | 0.179 | 400 MHz/<br>BBFO-z  | 10/<br>00:12:07 | 1       | 0.1854  | 407.66  | 173.81  | -<br>0.68 <sup>2</sup> | -0.732 | -0.052 | 0.004 | 0.004 |
| Fluoro-ethanol          | 0.097 | 0.54 | 0.179 | 600 MHz/<br>He cryo | 2/<br>00:04:12  | 3.7E+11 | 6.6E+10 | 5593.92 | 1398.95 | -<br>0.68 <sup>2</sup> | -0.752 | -0.072 | 0.000 | 0.000 |
| Fluoro-ethanol          | 0.097 | 0.54 | 0.179 | 600 MHz/<br>He cryo | 2/<br>00:04:12  | 1       | 0.1759  | 4166.42 | 811.98  | -<br>0.68 <sup>2</sup> | -0.755 | -0.075 | 0.001 | 0.001 |
| Fluoro-benzene          | 0.210 | 0.40 | 0.525 | 400 MHz/<br>BBFO-z  | 64/<br>01:06:39 | 1509686 | 2.8E+08 | 44.34   | 10605.5 | 2.27 <sup>3</sup>      | 2.263  | -0.007 | 0.010 | 0.010 |
| Fluoro-benzene          | 0.210 | 0.40 | 0.525 | 400 MHz/<br>BBFO-z  | 64/<br>01:06:39 | 1       | 178.187 | 35.48   | 9054.24 | 2.27 <sup>3</sup>      | 2.251  | -0.019 | 0.012 | 0.012 |
| Fluoro-benzene          | 0.210 | 0.40 | 0.525 | 600 MHz/<br>He cryo | 2/<br>00:04:02  | 4.8E+09 | 8.6E+11 | 120.46  | 14353.7 | 2.27 <sup>3</sup>      | 2.249  | -0.021 | 0.004 | 0.004 |
| Fluoro-benzene          | 0.210 | 0.40 | 0.525 | 600 MHz/<br>He cryo | 2/<br>00:04:02  | 1       | 167.76  | 87.69   | 9306.58 | 2.27 <sup>3</sup>      | 2.225  | -0.045 | 0.005 | 0.005 |
| 4-Fluoro-benzyl alcohol | 0.105 | 0.54 | 0.195 | 400 MHz/<br>BBFO-z  | 28/<br>00:30:17 | 2653372 | 6.2E+07 | 71.54   | 3261.66 | 1.36 <sup>5</sup>      | 1.369  | 0.009  | 0.006 | 0.006 |

|                         |       |      |       |                       |                 |         |         |         |         |                        |        |        |       |       |
|-------------------------|-------|------|-------|-----------------------|-----------------|---------|---------|---------|---------|------------------------|--------|--------|-------|-------|
| 4-Fluoro-benzyl alcohol | 0.105 | 0.54 | 0.195 | 400 MHz/<br>BBFO-z    | 28/<br>00:30:17 | 1       | 22.2259 | 47.34   | 2115.15 | 1.36 <sup>5</sup>      | 1.347  | -0.013 | 0.009 | 0.009 |
| 4-Fluoro-benzyl alcohol | 0.105 | 0.54 | 0.195 | 600 MHz/He<br>cryo    | 2/<br>00:04:02  | 2.3E+10 | 4.9E+11 | 434.81  | 10883.2 | 1.36 <sup>5</sup>      | 1.320  | -0.040 | 0.001 | 0.001 |
| 4-Fluoro-benzyl alcohol | 0.105 | 0.54 | 0.195 | 600 MHz/He<br>cryo    | 2/<br>00:04:02  | 1       | 19.9603 | 308.65  | 7817.24 | 1.36 <sup>5</sup>      | 1.300  | -0.060 | 0.001 | 0.001 |
| Trifluoro-ethanol       | 0.106 | 0.54 | 0.196 | 400<br>MHz/BBFO-<br>z | 10/<br>00:12:07 | 1.9E+07 | 4.5E+07 | 1007.1  | 2750.21 | 0.36 <sup>2</sup>      | 0.369  | 0.009  | 0.001 | 0.001 |
| Trifluoro-ethanol       | 0.106 | 0.54 | 0.196 | 400<br>MHz/BBFO-<br>z | 10/<br>00:12:07 | 1       | 2.3428  | 631.47  | 2259.46 | 0.36 <sup>2</sup>      | 0.370  | 0.010  | 0.001 | 0.001 |
| Trifluoro-ethanol       | 0.106 | 0.54 | 0.196 | 600 MHz/He<br>cryo    | 2/<br>00:04:02  | 4.6E+11 | 1E+12   | 10129.1 | 20045.4 | 0.36 <sup>2</sup>      | 0.333  | -0.027 | 0.000 | 0.000 |
| Trifluoro-ethanol       | 0.106 | 0.54 | 0.196 | 600 MHz/He<br>cryo    | 2/<br>00:04:02  | 1       | 2.1418  | 7069.06 | 16977.2 | 0.36 <sup>2</sup>      | 0.331  | -0.029 | 0.000 | 0.000 |
| Hexafluoro-isopropanol  | 0.084 | 0.54 | 0.155 | 400<br>MHz/BBFO-<br>z | 10/<br>00:12:07 | 1587281 | 7E+07   | 58.51   | 4602.26 | 1.67 <sup>2</sup>      | 1.648  | -0.022 | 0.008 | 0.007 |
| Hexafluoro-isopropanol  | 0.084 | 0.54 | 0.155 | 400<br>MHz/BBFO-<br>z | 10/<br>00:12:07 | 1       | 44.3177 | 43.14   | 3174.14 | 1.67 <sup>2</sup>      | 1.647  | -0.023 | 0.010 | 0.010 |
| Hexafluoro-isopropanol  | 0.084 | 0.54 | 0.155 | 600 MHz/He<br>cryo    | 2/<br>00:04:02  | 4.1E+10 | 1.6E+12 | 783.31  | 29082.4 | 1.67 <sup>2</sup>      | 1.586  | -0.084 | 0.001 | 0.001 |
| Hexafluoro-isopropanol  | 0.084 | 0.54 | 0.155 | 600 MHz/He<br>cryo    | 2/<br>00:04:02  | 1       | 37.7326 | 457.58  | 19508.5 | 1.67 <sup>2</sup>      | 1.577  | -0.093 | 0.001 | 0.001 |
| Difluoro-ethanol        | 0.086 | 0.54 | 0.160 | 400<br>MHz/BBFO-<br>z | 10/<br>00:12:07 | 2.1E+07 | 1.2E+07 | 782.85  | 792.05  | -<br>0.29 <sup>2</sup> | -0.263 | 0.027  | 0.001 | 0.001 |

|                  |       |      |       |                 |             |         |         |         |         |                    |         |        |       |       |
|------------------|-------|------|-------|-----------------|-------------|---------|---------|---------|---------|--------------------|---------|--------|-------|-------|
| Difluoro-ethanol | 0.086 | 0.54 | 0.160 | 400 MHz/BBFO-z  | 10/00:12:07 | 1       | 0.5441  | 592.86  | 557.69  | -0.29 <sup>2</sup> | -0.264  | 0.026  | 0.002 | 0.002 |
| Difluoro-ethanol | 0.086 | 0.54 | 0.160 | 600 MHz/He cryo | 2/00:04:02  | 5.2E+11 | 2.7E+11 | 8174.29 | 5544.35 | -0.29 <sup>2</sup> | -0.290  | 0.000  | 0.000 | 0.000 |
| Difluoro-ethanol | 0.086 | 0.54 | 0.160 | 600 MHz/He cryo | 2/00:04:02  | 1       | 0.5164  | 3525.57 | 4831.44 | -0.29 <sup>2</sup> | -0.287  | 0.003  | 0.000 | 0.000 |
| 4-Fluorophenol   | 0.025 | 0.54 | 0.046 | 400 MHz/BBFO-z  | 64/01:06:39 | 534503  | 3.2E+07 | 8.01    | 1231.33 | 1.77 <sup>3</sup>  | 1.781   | 0.011  | 0.058 | 0.051 |
| 4-Fluorophenol   | 0.025 | 0.54 | 0.046 | 400 MHz/BBFO-z  | 64/01:06:39 | 1       | 47.4213 | 6.73    | 845.26  | 1.77 <sup>3</sup>  | 1.676   | -0.094 | 0.070 | 0.061 |
| 4-Fluorophenol   | 0.025 | 0.54 | 0.046 | 600 MHz/He cryo | 2/00:04:02  | 1.9E+09 | 1.1E+11 | 51.04   | 1895.77 | 1.77 <sup>3</sup>  | 1.785   | 0.015  | 0.009 | 0.009 |
| 4-Fluorophenol   | 0.025 | 0.54 | 0.046 | 600 MHz/He cryo | 2/00:04:02  | 1       | 55.5844 | 35.66   | 1252.77 | 1.77 <sup>3</sup>  | 1.74495 | -0.025 | 0.013 | 0.012 |

<sup>a</sup>Experiment times to acquire the reported data are presented, the number of scans was varied leading to the different experiment times shown. In comparison to the method reported by Linclau *et al.*,<sup>2</sup> which involves sampling the aqueous and organic phases of a stirred biphasic n-octanol/water mixture which contains the compound of interest along with a known reference sample and acquiring  $^{19}\text{F}$  NMR spectra of each sample in turn, the recommended NMR parameters in the paper (30s relaxation delay for n-octanol sample, 60s relaxation delay for water sample, 64 transients for each sample) would result in a total NMR experiment time of at least 1.5 hours. The slice selective  $^1\text{H}$  method reported by Ben-Tal *et al.*<sup>6</sup> used 4 transients per phase, with a 60s relaxation delay (at least 8 minutes) to measure samples of logP -1.35-1.66. However, they do not state the sample concentrations and were unable to measure any signal from the n-octanol phase of a molecule with logP -2.78 when applying 256 transients to each phase (at least 8.5 hours instrument time).



### 1.8 Pulse sequences for measuring logP by $^{19}\text{F}$ NMR with spatial encoding

Several pulse sequences were explored for spatially encoded  $^{19}\text{F}$  NMR measurements for logP determination (**Figure S7**). The starting basis was a previous report of  $^1\text{H}$  NMR studies, which demonstrated utility with an n-octanol/water bilayer system.<sup>7</sup> In this  $^1\text{H}$  NMR work, the author recommends using a slice-selective spin-echo using slice-selective  $90^\circ$  and  $180^\circ$  pulses as referred to in the main text of this article, which reportedly yielded cleaner NMR data free from artefacts when compared with using a slice-selective  $90^\circ$  pulse only. Our experience agreed with this assessment and in the final stage of our method development, pulse sequence modification was applied to reduce complexity of handling shaped pulses in the context of a fully automated method by using a hard  $90^\circ$  followed by selective  $180^\circ$  degree pulse in the context of a spin-echo. The former approach was used initially; the latter approach was adopted as standard and for which the pulse sequence codes are provided here.

Spatial encoding was initially tested using  $^{19}\text{F}$  observation only ( $^1\text{H}$  decoupling not included, **Figure S7a**). Using the Bruker “popt” routine for arraying parameters, pulse offset frequencies, spoofs, for both shaped pulses were arrayed across a series of values ranging from -21500 Hz to +21500 Hz in steps of 3 kHz, allowing sample positioning to be checked. At a magnetic field strength of 9.4 T, this gives rises to measurement across a physical distance of 12 mm ( $\pm 6$  mm either side of the centre of the r.f. coil). Details of pulses are described in the methods section of the main article but using pulse bandwidths of 6 kHz combined with frequency offsets as described and gradient pulses set to 16% of maximum yielded maximum excitation offsets of 6.1 mm from the centre of the receiving coil with a slice thickness of 1.7 mm. Arraying the pulse offset in steps of 3 kHz allowed slices to overlap by half a slice thickness per offset frequency increment. Running the acquisition as a pseudo two-dimensional data array ensured no physical gaps occurred when scanning the length of the NMR sample for signal. This approach ensures alignment of the solvent interface with the rf receiver coil centre when initial set up is carried out (**Figure S8**). Clear differences in lineshape are observed when comparing data acquired either remote from or adjacent to the solvent interface. Good lineshape is evidenced at locations remote from the solvent interface (**Figure S8b** and **S8d**) with signals showing their expected  $^3J_{\text{FH}}$  couplings and splitting patterns, indicating good magnetic field homogeneity over the narrow 1.7 mm range of the separately sampled slices. Sampling adjacent to the solvent interface (**Figure S8c**) yields spectra with substantial lineshape broadening, a result of poor magnetic field homogeneity at the solvent-to-solvent interface. This effect persists for some distance either side of the solvent interface, evidenced through chemical shift displacement and underlying resonance broadening (**Figure S8a**). As described in the main article, adjustment of slice position and thickness can be readily

calculated and should be set when implementing the described procedures for the first time on any NMR spectrometer.

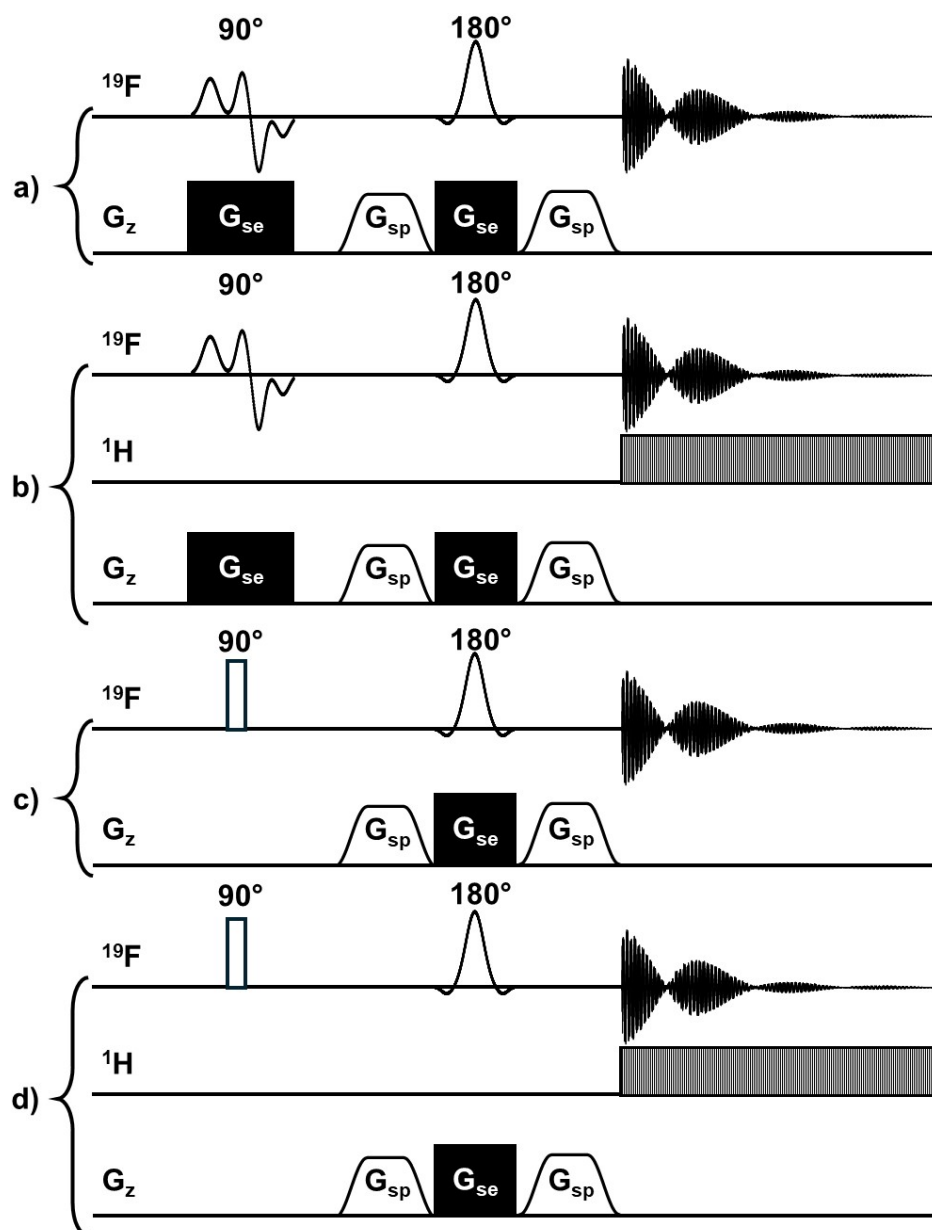

**Figure S7:** Spatial encoding spin-echo pulse sequences as a basis for automated logP determination by  $^{19}\text{F}$  NMR spectroscopy. a)  $^{19}\text{F}$  observation only using two slice-selective pulses. b) as for a) but with proton decoupling *via* inverse gating. c)  $^{19}\text{F}$  observation only, using non-selective hard  $90^\circ$  pulse excitation followed by slice-selective  $180^\circ$  pulse (spatial encoding by gradient pulses, pulse sequence selgradgpse2d in section 1.11). d) as for c) but with proton decoupling *via* inverse gating (pulse sequence selgradgpigse2d in section 1.11).  $G_z$  – pulsed field gradients:  $G_{se}$ : spatial encoding square gradient = 16% of maximum  $\equiv 8.8 \text{ G cm}^{-1}$ ;  $G_{sp}$ : spoiling, smoothed square gradient = 45%  $\equiv 24.8 \text{ G cm}^{-1}$ . <sup>1</sup>. Shaped excitation ( $90^\circ$ ) and spin-echo refocussing ( $180^\circ$ ) r.f. pulses use gaussian cascade and rsnob

profiles respectively: excitation  $90^\circ$  G4 cascade = 1303.33  $\mu\text{s}$ , bandwidth 6 kHz; refocussing  $180^\circ$  Rsnob = 388.67  $\mu\text{s}$ , bandwidth 6 kHz. Pulse powers were initially set manually based on calculations using the Bruker shaped tool module within Topspin.

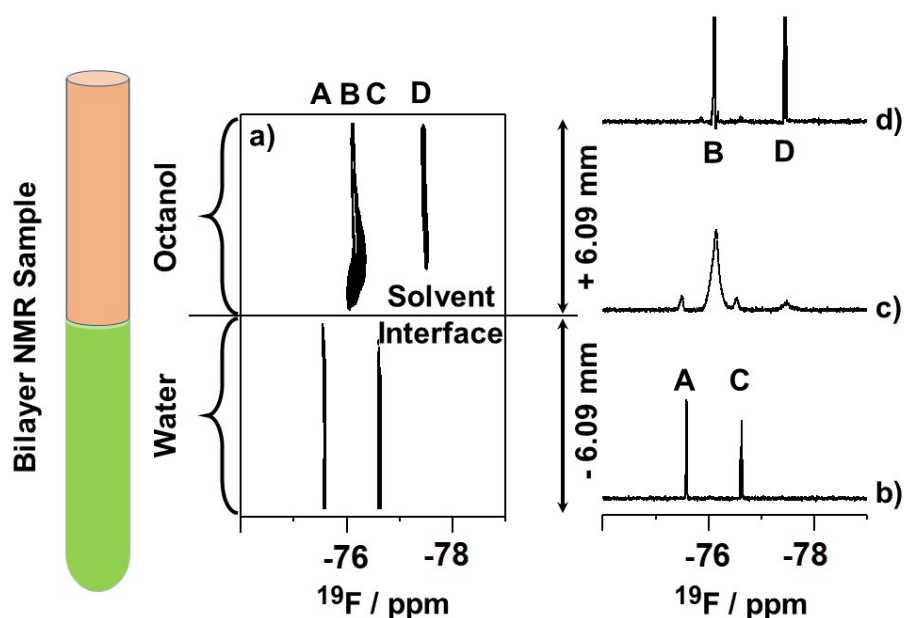

**Figure S8:** Slice selective  $^{19}\text{F}$  NMR data arrayed along a sample length using parameters as described. a) Pseudo 2D data showing  $^{19}\text{F}$  NMR responses across 12 mm of the sample length either side of and showing alignment with the solvent interface at the centre of the receiver coil. **A/B**: doublet signals arising from hexafluoroisopropanol, HFIP; **C/D**: triplet signals arising from trifluoroethanol, TFE. b) 1D  $^{19}\text{F}$  spatially encoded spectrum at the lower measurement extremity extracted from the pseudo 2D data; c) as b) but at the solvent interface; d) as b) and c) but at the higher measurement extremity. The offset frequency, spoofs, of the selective pulse was varied as -21500 Hz to +21500 Hz using the Bruker “popt” routine for parameter arrays. Data were stored as a serial (ser) file and were transformed along the acquisition dimension only with individual slices separately phase corrected to adjust for the phase modification arising from the pulse offset with spatial encoding. NMR data were acquired at a magnetic field strength of 9.4 T using a two-channel Bruker AVANCE Nanobay NMR spectrometer equipped with a BBFO-z probehead operating at a temperature of 300 K and according to the parameters described in the text. Data are available to download from <https://doi.org/10.15129/6ca1ffd8-270b-4ede-a3c0-91e083d57e21>

As these data show, optimal line-shape is achieved at a distance of at least 6 mm from the r.f. receiver coil centre. For automation, adjustment of the solvent interface position should be carried out with

care when preparing samples. With solvent interface correctly aligned using a typical NMR sample depth gauge, parameters can be set to ensure that quantitative, spatially encoded NMR data are acquired at a suitable distance from the solvent interface. This ensures optimal NMR line-shape integrity, reproducibility and reliability. These checks are recommended but are not essential provided solvent volumes and correct sample depth gauging guidelines detailed in this article are followed.

### 1.9 Trial procedures and testing

Definitive automated method development from which reliable  $\log P$  NMR data could be generated automatically with assurance was based on use of the pulse sequences shown at **Figures S7c** and **S7d** for which code is reported. In this work, for long duration experiments, a 2 mm diameter sealed capillary tube containing  $\text{D}_2\text{O}$  for the lock signal was included in the bilayer sample. This required n-octanol and water layer volumes of 200  $\mu\text{L}$  each to fix the solvent interface exactly at the rf receiver coil centre when a 5 mm diameter NMR tube was correctly depth adjusted using the Bruker supplied depth gauge and sample shuttle combination. In the absence of a sealed capillary (for unlocked data acquisition), 270  $\mu\text{L}$  of each solvent is required to accurately set the solvent interface at the rf receiver coil centre.

Walk-up use running under Bruker's IconNMR interface relies on the ability to define lists of shaped pulses in combination with the Wavemaker function of TopSpin. This enables automated generation of complex waveforms without the need for user intervention. Acquisition of data occurs in a pseudo 2D format by incrementing the shaped pulse list to yield two spatially encoded  $^{19}\text{F}$  NMR spectra stored in the same serial file as one another and which represent sampling of upper and lower layers of the bilayer sample. Definition of the shaped pulse using the Wavemaker format ensures that a bandwidth of 6 kHz is used for the selective refocussing pulse at frequency offsets yielding 1.7 mm thick sample slices at a distance 6 mm either side of the rf coil centre. The frequency offset may be set as a variable using cnst52 and cnst53. At 9.4 T, setting cnst52 to -60 ppm and cnst53 to + 60 ppm results in slice-selection at  $\pm 6.1$  mm either side of the r.f. coil centre when a 16% gradient pulse accompanies the 6 kHz bandwidth selective Rsnob refocussing pulse. Relaxation delay and the number of transients may be set to ensure that full recovery of spin magnetization occurs between transients and that adequate signal-to-noise ratio is generated for the weakest signals, respectively. These conditions are designed to reduce integration errors and improve the reliability of  $\log P$  values determined from such data. Example data, one using a  $^{19}\text{F}$  observe approach and one using  $^{19}\text{F}$  observe with inverse gated  $^1\text{H}$  decoupling are shown following (**Figure S9**).

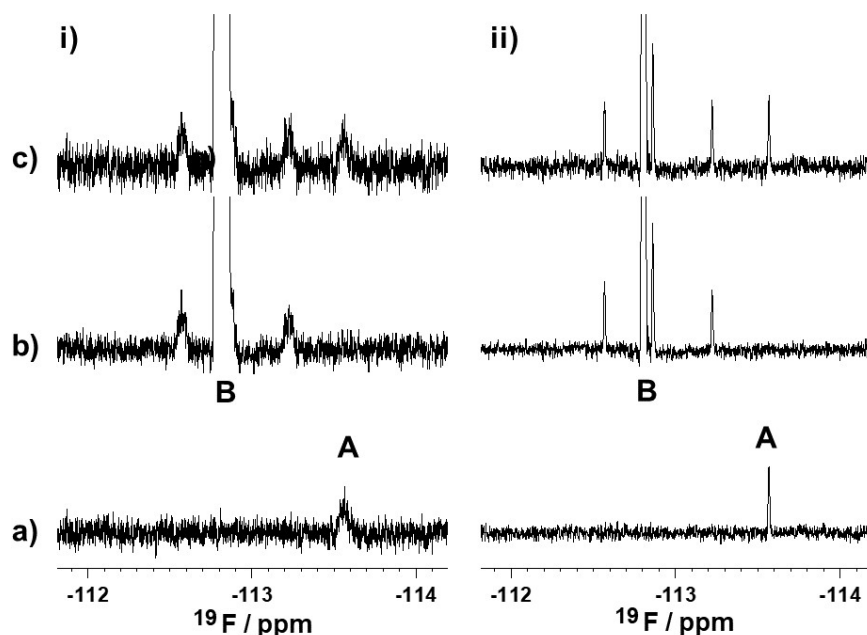

**Figure S9:** LogP by spatially encoded  $^{19}\text{F}$  NMR spectroscopy. i) In the absence of  $^1\text{H}$ -decoupling. ii) Equivalent  $^{19}\text{F}$ - $\{^1\text{H}\}$  NMR data for the same sample. a) Spectra from lower, aqueous layer. b) Spectra from upper, n-octanol layer. c) Summation of spectra at a) and b). Spectra were acquired to determine, by  $^{19}\text{F}$  NMR, the experimental logP value for fluorobenzene. **A** -  $^{19}\text{F}$  NMR signal from fluorine in fluorobenzene partitioned into the aqueous layer. **B** - as **A** but for the majority fluorobenzene present in the organic, n-octanol layer.

In this example, data were acquired at a  $B_0$  field strength of 9.4 T using a Bruker BBFO-z probe with 256 transients for fluorine NMR data from both upper and lower layers of the bilayer sample and a recycle delay of 25 s per transient, leading to a total experiment time of approximately 4.5 hrs. Individual, slice-selective  $^{19}\text{F}$  NMR spectra may be checked for data quality, as shown at **Figure S9a** and **Figure S9b**. Preference is made for integration of the data using the sum of slices spectra (**Figure S9c**). This ensures the same scaling is used for all integrated peaks. For overlapping peaks, the summation may include offsetting the chemical shift scale of one spectrum relative to the other to avoid coincidence of signals arising from solute in different layers of the bilayer sample. The presence of  $^{13}\text{C}$  satellites (from  $^1J_{\text{FC}}$  and  $^2J_{\text{FC}}$ ) should be included in the integration. The logP value calculated from these data are consistent with previously published experimentally measured values.<sup>3,4,5,6</sup> The improvement shown in the signal-to-noise ratio for the  $^{19}\text{F}$ - $\{^1\text{H}\}$  NMR data (**Figure S9ii**) compared with the equivalent  $^{19}\text{F}$  NMR data without proton decoupling (**Figure S9i**) makes the former approach desirable when the NMR spectrometer hardware allows. Under these conditions, care should be taken to reduce the acquisition time, as described in the main article, to prevent excessive strain on the r.f. coils and avoid r.f. sample heating. With judicious use of processing parameters, logP determination

by spatially encoded <sup>19</sup>F NMR data acquired without proton decoupling is feasible if this is the only available hardware configuration available to the experimentalist.

Several approaches for improving signal-to-noise may be considered. Spatial encoding itself reduces the quantity of detectable signal overall. However, this may be enhanced through acquisition of data in which multiple frequency offsets are encoded into each pulse, thereby enabling summation of individual slices over a bigger physical volume. Care is required to ensure that lineshape integrity is maintained across separate slices within the same sample layer or that sampling does not occur close to the solvent-to-solvent interface, as noted earlier. An alternative approach is the modification of acquisition parameters to select for a larger spatially encoded volume, thereby generating more signal per slice. At a gradient strength of 8.8 G cm<sup>-1</sup>, shaped pulses adjusted for bandwidths of 6 kHz at frequencies offset by  $\pm 21.5$  kHz at a magnetic field strength of 9.4 T yield slices that are 1.7 mm thick. Reducing the spatial encoding gradient strength to 4.4 G/cm increases the slice thickness to 3.4 mm, thereby doubling the volume and the number of detected nuclei. However, to compensate for the effect this adjustment has on the position of the spatial encoding within the sample requires an offset adjustment of  $\pm 10.75$  kHz rather than  $\pm 21.5$  kHz (equivalent to setting cnst52/cnst53 to  $\pm 30$  ppm for measurements using a 9.4 T magnet). Care should be taken to ensure that Wavemaker generates the correct set of shaped pulses if such modifications are desired.

#### 1.10 Automated measurement on Bruker AVANCE and AVANCE NEO systems under IconNMR.

To acquire data automatically under IconNMR for logP determination, the approach uses pulse schemes shown at **Figure S7c** and **S7d** alongside a series of macros and automation programs used for acquiring and post-acquisition processing the <sup>19</sup>F NMR data.

##### 1.10.1 Instructions for setting up the NMR spectrometer.

**<sup>2</sup>H-locked and unlocked operation.** For <sup>2</sup>H-capillary locked operation when a lock capillary is present, it's recommended to create a lock table entry specifically for solvent selection when a capillary is present. In our practice, using Bruker Topspin command edlock to access the lock solvent table, the entry for solvent "D2O" was copied to a new line in the lock solvent table and renamed as "D2O\_Cap". This was then edited such that the loop gain value was altered from 5 to -22. This value was found to be suitable for stabilizing the NMR lineshape under slice-selective operations. Once installed, this solvent may be selected from the IconNMR solvent pull down menu. Within the IconNMR Configuration interface under Lock/Shim Options subsection Solvent/Probe Dependencies, the associated shim file entry for the "D2O\_Cap" solvent should be left blank to prevent default shim file loading at the time of experiment execution. This allows for the shims to be set on a preceding sample

prior to insertion of a bilayer sample. Under the same Configuration window the associated shim routine should be set to “Skip Shimming (IconNMR not responsible)” in order to prevent shimming from occurring under automation.

For bilayer samples without a source of  $^2\text{H}$  lock signal (unlocked data acquisition), we found it helpful to create a further new solvent entry within the lock solvent table that mirrored solvent “None” (no solvent). The new entry (e.g. named “None\_FlogP”) should be edited to disable it as a lock solvent (achieved by unticking the radio button against “Lock Solvent” within the Edit solvent parameters dialogue box. Thereafter, within the IconNMR Configuration interface, associated shim files for this solvent should be left blank, associated shim routine should be set to “Skip Shimming (IconNMR not responsible)” and associated lock routine should be set to “LOCK-OFF; #switch sweep and lock off”. This “solvent” entry should be selected from the IconNMR experiment interface when a bilayer sample has no source of  $^2\text{H}$  and will therefore run unlocked.

**Parameter Source.** For Bruker systems, two or three sets of parameters should be installed within the user parameter directory of the spectrometer.

The first parameter set, 19F\_wsw, should be a copy of the standard 19F parameters where the sweep width, sw, has been set to a large value (e.g. 490 ppm) with the frequency offset adjusted to  $\omega_1\text{p} = -100$  ppm. A copy of this parameter set is available with the archive data and should be installed within the directory ~/exp/stan/nmr/par/user under the Topspin version directory of the relevant NMR spectrometer. Execution of paracon will enable the parameter set to be adapted for the spectrometer in question. This parameter set is called by the au program find19Fo1\_run\_FlogP and is used to run a scout scan to find the largest peak in the spectrum and set the offset,  $\omega_1$ , for subsequent slice-selective data acquisitions.

The second parameter set, 19F\_LogP (available from the data archive for both AVANCE and AVANCE NEO NMR spectrometers and adapted for the relevant NMR spectrometer by executing paracon to convert the parameter set for local use) calls the relevant pulse program and associated parameters for acquisition of  $^1\text{H}$ -coupled  $^{19}\text{F}$  NMR logP data. Once installed, the IconNMR Configuration should be edited to include the parameter set so that it may be called from the “Experiment” pull down menu within the IconNMR automation window. The parameter set includes the aunm entry “find19Fo1\_run\_FlogP” for automated data acquisition and the aunmp entry “lpp” for automated data processing. Further details of the operation of these processes and their associated code are presented below and are available from the data archive.

A third parameter set, 19F\_Hdec\_LogP, may also be installed in the same way provided the spectrometer hardware is configured for  $^1\text{H}$  decoupling whilst observing  $^{19}\text{F}$ . In this case, the relevant pulse program suitable for  $^{19}\text{F}\{-^1\text{H}\}$  NMR spectroscopy is called. Installation and configuration should occur in the same way as described above for data acquisition without proton decoupling. Relevant parameter sets and all macros and au programs are available from the archive with program codes and explanations provided in the following section.

#### 1.10.2 Code for pulse sequences and automation

For fully automated  $^{19}\text{F}$ -based logP NMR data acquisition, program codes are provided under section “1.11 Code”. These should be installed as follows:

- a) Into the ~/exp/stan/nmr/au/src/user directory or equivalent of Topspin, add the automation programs “find19Fo1\_run\_FlogP”, “au\_wvm.selecho”, “addp”, “lpp” and “split2D\_silent”. “find19Fo1\_run\_FlogP” runs a scout scan to find the tallest  $^{19}\text{F}$  NMR signal, sets the offset frequency, o1, to its frequency position, calls au\_wvm.selecho to generate the relevant shaped pulses and executes the data acquisition according to the specified number of scans and relaxation delay. “split2D\_silent” splits a pseudo 2D data set into separate 1D spectra. “addp” reads the data in procno 2, adds this to the data stored in procno 3 and writes the result (sum of spectra) into procno 4. The data in procno 4 (sum of spectra) can then be integrated manually from which the logP value is calculated.
- b) Into the ~/exp/stan/nmr/lists/mac/user directory or equivalent of Topspin, add the macro “logpproc”. This macro performs a Fourier transform of the acquired data along f2, phase corrects each row individually, baseline corrects along f2 and then calls au program “split2D\_silent” followed by “addp”.
- c) Into the ~/exp/stan/nmr/lists/pp/user directory or equivalent of Topspin, add the pulse sequences “selgradgpigse2d” and “selgradgpse2d”. These are provided as versions suitable for running under later versions of Topspin 3.x or under Topspin 4.x depending on spectrometer vintage.
- d) Install the described parameter sets detailed under the previous section or create a parameter set for  $^{19}\text{F}$  detection where the pulse program is either selgradgpse2d or selgradgpigse2d and set cnst52 and cnst53 to appropriate values to define the slice-selective pulse offset as described in the main article text and within this ESI. Ensure that aunm is set to find19Fo1\_run\_FlogP and that aunmp is set to lpp. For ease of implementation, suitable parameter sets and all programs are made available from



<https://doi.org/10.15129/6ca1ffd8-270b-4ede-a3c0-91e083d57e21> together with  
example data set

```

1  1.11 Code
2  au program "addp"

3  /*****
4  /*  addp    24.04.2024
5  /*****
6  /*  Short Description :
7  /*  Calculate the sum of spectra from procno.
8  /*****
9  /*  Keywords :
10 /*  add, summation of spectra
11 /*****
12 /*  Description/Usage :
13 /*  Calculate the sum of spectra from procno. The
14 /*  program assumes the current dataset is the one to be
15 /*  added. It must be the first or last one of
16 /*  increasing procno. The current data set is added
17 /*  in a loop to "num" subsequent procno.
18 /*****
19 /*  Adapted by JAP from previous subtraction diffp au program
20 /*  Author(s) :
21 /*  Name:      Rainer Kerssebaum
22 /*  Organisation: Bruker BioSpin GmbH
23 /*  Email:     rainer.kerssebaum@bruker-biospin.de
24 /*****
25 /*  Name  Date  Modification:
26 /*  rke    900827  created
27 /*  rke    100716  bugfix for deleted ser-file
28 /*  rke    100716  bugfix for il not correctly initialised
29 /*  jap    240424  modified to add two spectra together
30 /*****
31
32 int  first,add,num,tprocno;
33 double swp;
34
35
36 GETCURDATA
37 add=procno+1;
38 first=procno+2;
39 /*  GETINT("Enter first procno for addition : ",first)
40 if (add==first)
41   STOPMSG("program aborted\ncannot subtract from itself")
42 if (first>add)
43   { /*  num=1;
44 /*  GETINT("Enter number of additions : ",num) */
45   tprocno=(1+(int)((first+num)/10))*3+1;
46 /*  }
47 else
48   { num=add-first;
49   tprocno=(1+(int)((add+1)/10))*3+1;
50   }
51 GETINT("Enter first target procno : ",tprocno);
52 /*
53 DATASET(name,expno,first,disk,user)

```

```

54  FETCHPARS("SW_p",&swp)
55
56  for (i1=0;i1<num;i1++)
57  { DATASET(name,expno,first+i1,disk,user)
58    WRPPARAM(tprocno+i1)
59    DATASET(name,expno,tprocno+i1,disk,user)
60    STOREPARS("SW_p",swp)
61    DATASET2(name,expno,first+i1,disk,user)
62    DATASET3(name,expno,add,disk,user)
63    STOREPAR("DC",1.0)
64
65    ADD
66  }
67  VIEWDATA_SAMEWIN
68  DATASET(name,expno,4,disk,user)
69  QUITMSG("--- sum of slices ---")
70
71  au program "find19Fo1_run_FlogP"
72  /******
73  /*      Find19Fo1 based on FindwaterTS3          22.08.2008          */
74  /******
75  /*      Short Description :                      */
76  /*      AU program to automatically determine optimum o1p          */
77  /*      frequency centring 19F data acquisition on largest peak    */
78  /******
79  /*      Keywords :                      */
80  /*      19Fo1p                      */
81  /******
82  /*      Description/Usage :                      */
83  /*      AU program using signal after 90 degree pulse          */
84  /*      to optimise o1 frequency when carrying out FlogP protocols  */
85  /*      Does rga and zg, but limits rg to maximum of 128          */
86  /*      Run this from a dataset with pulprog set to the          */
87  /*      sequence of your choice!                      */
88  /******
89  /*      Author(s) :                      */
90  /*      Name          : Peter Gierth, Andrew Gibbs          */
91  /*      Organisation   : Bruker UK                      */
92  /*      Email          : peter.gierth@bruker.co.uk          */
93  /*      Name          : John Parkinson - modified for FlogP      */
94  /*      Organization   : University of Strathclyde          */
95  /******
96  /*      Name          Date          Modification:          */
97  /*      ptg/agi      20080822          created          */
98  /*      ptg          20100528 Updated for TS3 PROCPATH()syntax    */
99  /*                      and power level parameters          */
100 /* ptg          20150907 Sort out peak picking range to          */
101 /*                      be just around rough O1          */
102 /*                      and set power based on RG          */
103 /* ptg 20150913 Add o1calib option (call as "findwaterTS3 o1calib") */
104 /* rss 20250612 use locnuc, remove back prediction of beginning of 19F */
105 /*                      spectrum, remove extra RGA before wavemaker call */

```

```
106 /*****  
107  
108 float PSH, PSP, IPS, maxpsh, maxpsp, maxips, cnst1;  
109 char del[PATH_MAX], path[PATH_MAX], curp[PATH_MAX], locnuc[20];  
110 double sf, sfo1, o1, sfo1real;  
111 int noofscans, pscal_save;  
112 FILE *fptr;  
113 char pulprog[50];  
114 int noofdumy;  
115 int digmod;  
116 char cmdsave[BUFSIZ];  
117 char solvent[100];  
118 char o1string[100];  
119 int expnosave;  
120 float p1, pl1;  
121 int o1cal=0;  
122 float rg, rffactor;  
123 double flp, f2p;  
124 double bf;  
125 double peakFreqHz, peakFreqPPM, peakIntensity;  
126 int numPeaks, i;  
127  
128  
129 GETCURDATA  
130 expnosave = expno;  
131  
132 if (strcmp(cmd, "o1calib") == 0)  
133 {  
134     o1cal = 1 ;  
135 }  
136  
137  
138 FETCHPAR("P 1", &p1)  
139 FETCHPAR("PLdB 1", &pl1)  
140 FETCHPAR("LOCNUC", &locnuc);  
141 FETCHPAR("O1", &o1)  
142 FETCHPARS("RG", &rg)  
143 expno=99998;  
144 SETCURDATA  
145  
146 // setup 19F dataset  
147  
148 RPAR("19F_wsw", "all")  
149 STOREPAR("PULPROG", "zg")  
150 STOREPAR("O1", o1)  
151 STOREPAR("P 1", p1)  
152 STOREPAR("PLdB 1", pl1)  
153 STOREPAR("NS", 1)  
154 STOREPAR("DS", 0)  
155 STOREPAR("RG", 1.0)  
156 STOREPAR("LOCNUC", locnuc)  
157  
158 ZG  
159  
160 FETCHPARS("BF1", &bf);
```

```

161
162 EF
163 MC
164 f1p=(o1/bf)+100.0;
165 f2p=(o1/bf)-100.0;
166
167 STOREPAR("F1P", f1p)
168 STOREPAR("F2P", f2p)
169 STOREPAR("PC", 2.0)
170 PP
171
172 /* find strongest peak */
173
174 numPeaks = readPeakList(ROCPATH(0));
175
176     maxips=0.0;
177     maxpsh=0.0;
178     for (i=0; i<numPeaks; i++)
179     {
180         peakIntensity = getPeakIntensity(i);
181         peakFreqHz = getPeakFreqHz(i);
182         peakFreqPPM = getPeakFreqPPM(i);
183         if (peakIntensity > maxips)
184         {
185             maxips = peakIntensity;
186             maxpsh = peakFreqHz;
187             maxpsp = peakFreqPPM;
188         }
189     }
190     freePeakList();
191
192 FETCHPARS("SOLVENT", solvent)
193 FETCHPARS("BF1",&sf)
194 sfo1=sf + maxpsh * 1.0e-6;
195
196 expno=expnosave;
197 SETCURDATA
198
199 // store correct o1
200
201 STOREPAR("SFO1",sfo1);
202 XAU("au_wvm.selecho","")
203 QUIT
204
205 au program "lpp"
206
207 /******
208 /* au program for aunmp entry to call logpproc for processing FlogP data */
209 /* JAP University of Strathclyde 04/2025 */
210 /******
211 XMAC("logpproc")
212 QUIT
213

```

## 213 au program "split2d\_silent"

```

214 /*****
215 /*      split2D_silent                24.04.2024                */
216 /*****
217 /*      Short Description :                */
218 /*      Program which splits a processed 2D file into single    */
219 /*      1D spectra, extracting 2 slices only without prompting */
220 /*****
221 /*****
222 /*      Description/Usage :                */
223 /*      Program which splits a logP processed 2D file into two  */
224 /*      single 1D spectra.                */
225 /*****
226 /* Based on original author work by Rainer Kerssebaum          */
227 /*      Author(s) :                */
228 /*      Name       : Rainer Kerssebaum                */
229 /*      Organisation : Bruker Analytik                */
230 /*      Email      : rainer.kerssebaum@bruker.de         */
231 /* Modified John A. Parkinson                */
232 /* Organisation : University of Strathclyde            */
233 /*****
234 /*      Name       Date      Modification:                */
235 /*      rke        910827 created                        */
236 /*      jap        240424 modified                        */
237 /*****
238
239 int si, tprocno;
240
241 GETCURDATA
242 FETCHPARIS("SI",&si)
243
244 for (i1=1;i1<=si;i1++)
245     RSR(i1,i1+tprocno-1)
246 IPROCNO
247 VIEWDATA_SAMEWIN
248 DATASET(name,expno,2,disk,user)
249 QUIT
250
251 au program "au_wvm.selecho"
252
253 /*****
254 /*      au_wvm.selecho based on au_wvm from 12.12.2019        */
255 /*****
256 /*      Short Description :                */
257 /*      General AU program for data acquisition.                */
258 /*****
259 /*      Keywords :                */
260 /*      zg                */
261 /*****
262 /*      Description/Usage :                */
263 /*      General AU program for data acquisition.                */
264 /*      Create shaped pulses as defined in the pulse program using WaveMaker */
265 /*****

```

```

266 /*      Author(s) :                               */
267 /*      Name       : Peter Kiraly                   */
268 /*      Organisation : University of Manchester      */
269 /*      Email      : peter.kiraly@manchester.ac.uk  */
270 /******
271 /*      Name       Date   Modification:             */
272 /*      pdv        191212 created                   */
273 /*      rss        250221 modified for use with pp selgradgpse2d.rss */
274 /******
275 /******
276
277 double o1p, offset;
278 offset = 230.0;
279
280 GETCURDATA
281 FETCHPAR("O1P", &o1p)
282 STOREPAR("CNST 52", o1p+offset)
283 STOREPAR("CNST 53", o1p-offset)
284 XCMD("wvm -q")
285 XAU("au_zg", "")
286 QUIT
287
288 macro "logpproc"
289 # Procedure for automated processing of 19FlogP NMR data
290 #
291 # Step 1 - Performs f2 transformation on current pseudo 2D
292 # Step 2 - Phase corrects each row individually
293 # Step 3 - Baseline corrects in f2
294 # Step 4 - Extract 2 spectra then write them to procno 2 and procno 3 using au program split2D_silent
295 # Step 5 - Read procno 2, add procno 3
296 # Step 6 - Write to procno 4 and display result
297 xf2
298 diff_apk2d 1
299 abs2
300 split2D_silent
301 addp
302
303
304
305
306
307
308
309

```

**310 Pulse Programs for AVANCE NEO systems running under Topspin version 4.x**

**311 "selgradgpse2d" for  $^{19}\text{F}$  NMR data acquisition with proton coupling**

```
312 ;Based on selgpse
313 ;avance-version (21/09/15)
314 ;1D spin echo with gradients
315 ; using selective refocussing with a shaped pulse
316 ; in the presence of a gradient for slice selectivity
317 ; pseudo-2D for selecting two slices
318 ; uses wavemaker to create the two pulses
319 ;
320 ;$CLASS=HighRes
321 ;$DIM=1D
322 ;$TYPE=
323 ;$SUBTYPE=
324 ;$COMMENT=
325
326
327 #include <Avance.incl>
328 #include <Delay.incl>
329 #include <Grad.incl>
330
331 create_shape(sp2, rsnob, name= ref_plus60, stepSize=10.0 us, bandwidth=6000 Hz, offset=$cnst52
332 ppm)
333 create_shape(sp3, rsnob, name= ref_minus60, stepSize=10.0 us, bandwidth=6000 Hz, offset=$cnst53
334 ppm)
335 "TAU1=de"
336 "TAU2=p1*2/PI"
337
338
339 # ifdef CALC_SPOFFS
340 "spoffs2=bf1*(cnst21/1000000)-o1"
341 # else
342 # endif /*CALC_SPOFFS*/
343
344 "l0=1"
345
346 "acqt0=0"
347 baseopt_echo
348
349 1 ze
350 2 30m
351
352 # ifdef FLAG_BLK
353 4u BLKGRAD
354 # else
355 4u
356 # endif /*FLAG_BLK*/
357
358 d1 p11:f1
359 50u UNBLKGRAD
360
361 p1 ph1
```



```

362 TAU1
363 p16:gp2
364 d16
365 5u gron1
366 if "l0 %2 == 1"
367 {
368     p12:sp2:f1 ph2:r
369 }
370 else
371 {
372     p12:sp3:f1 ph2:r
373 }
374 5u groff
375 p16:gp2
376 d16
377
378 # ifdef FLAG_BLK
379 TAU2
380 # else
381 TAU2 BLKGRAD
382 # endif /*FLAG_BLK*/
383
384 go=2 ph31
385 30m mc #0 to 2 F1QF(calcl0,1))
386
387 # ifdef FLAG_BLK
388 4u BLKGRAD
389 # else
390 4u
391 # endif /*FLAG_BLK*/
392 exit
393
394 ph1=0 0 3 3 2 2 1 1
395 ph2=1 3
396 ph31=0 0 1 1 2 2 3 3
397
398 ;p11 : f1 channel - power level for pulse (default)
399 ;sp2: f1 channel - shaped pulse – first offset frequency
400 ;sp3: f1 channel – shaped pulse – second offset frequency
401 ;p1 : f1 channel - 90 degree high power pulse
402 ;p12: f1 channel - 180 degree shaped pulse
403 ;p16: homospoil/gradient pulse [1 msec]
404 ;d1 : relaxation delay; 1-5 * T1
405 ;d16: delay for homospoil/gradient recovery
406 ;cnst21: chemical shift for selective pulse (offset, in ppm)
407 ;ns: 2 * n, total number of scans: NS * TD0
408 ;ds: 4
409 ;phcor 2 : phasedifference between power levels sp1 and p11
410 ;choose p12 according to desired selectivity
411 ;the flip-angle is determined by the amplitude
412 ;set O1 on resonance on the multiplet to be excited or use spoffs
413
414 ;use gradient ratio: gp 16
415 ; 45
416

```

```

417 ;for z-only gradients:
418 ;gpz1: 16% (for selectivity)
419 ;gpz2: 45%
420
421 ;use gradient files:
422 ;gpnam1: SMSQ10.100
423
424 ;preprocessor-flags-start
425 ;CALC_SPOFFS: automatically calculate spoofs for selective pulses
426 ;      start experiment with option -DCALC_SPOFFS (eda: ZGOPTNS)
427 ;FLAG_BLK: for BLKGRAD before d1 rather than go
428 ;option -DFLAG_BLK: (eda: ZGOPTNS)
429 ;preprocessor-flags-end
430
431 ;$Id: $
432
433 "selgradgpigse2d" for  $^{19}\text{F}$ - $\{^1\text{H}\}$  NMR data acquisition with proton decoupling
434 ;Based on selgpse
435 ;avance-version (21/09/15)
436 ;1D spin echo with gradients
437 ; using selective refocussing with a shaped pulse
438 ; in the presence of a gradient for slice selectivity
439 ; pseudo-2D for selecting two slices
440 ; use wavemaker to create the two pulses
441 ; with decoupling
442 ; RSS 2025/2/23
443 ;
444 ;$CLASS=HighRes
445 ;$DIM=1D
446 ;$TYPE=
447 ;$SUBTYPE=
448 ;$COMMENT=
449
450 #include <Avance.incl>
451 #include <Delay.incl>
452 #include <Grad.incl>
453
454 create_shape(sp2, rsnob, name= ref_plus60, stepSize=10.0 us, bandwidth=6000 Hz, offset=$cnst52
455 ppm)
456 create_shape(sp3, rsnob, name= ref_minus60, stepSize=10.0 us, bandwidth=6000 Hz, offset=$cnst53
457 ppm)
458 "TAU1=de"
459 "TAU2=p1*2/PI"
460
461 # ifdef CALC_SPOFFS
462 "spoofs2=bf1*(cnst21/1000000)-o1"
463 # else
464 # endif /*CALC_SPOFFS*/
465
466 "l0=1"
467 "d11=30m"
468

```

```
469 "acqt0=0"
470 baseopt_echo
471
472
473 1 ze
474   d11 pl12:f2
475 2 30m do:f2
476
477 # ifdef FLAG_BLK
478   4u BLKGRAD
479 # else
480   4u
481 # endif /*FLAG_BLK*/
482
483 d1 pl1:f1
484 50u UNBLKGRAD
485
486 p1 ph1
487 TAU1
488 p16:gp2
489 d16
490 5u gron1
491 if "l0 %2 == 1"
492 {
493   p12:sp2:f1 ph2:r
494 }
495 else
496 {
497   p12:sp3:f1 ph2:r
498 }
499 5u groff
500 p16:gp2
501 d16
502
503 # ifdef FLAG_BLK
504   TAU2
505 # else
506   TAU2 BLKGRAD
507 # endif /*FLAG_BLK*/
508
509 go=2 ph31 cpd2:f2
510 30m do:f2 mc #0 to 2 F1QF(calclc(l0,1))
511
512 # ifdef FLAG_BLK
513   4u BLKGRAD
514 # else
515   4u
516 # endif /*FLAG_BLK*/
517
518 exit
519
520
521 ph1=0 0 3 3 2 2 1 1
522 ph2=1 3
523 ph31=0 0 1 1 2 2 3 3
```

```

524
525
526 ;p11 : f1 channel - power level for pulse (default)
527 ;p12: f2 channel - power level for CPD/BB decoupling
528 ;sp2: f1 channel - shaped pulse for first frequency offset
529 ;sp3: f1 channel – shaped pulse for second frequency offset
530 ;p1 : f1 channel - 90 degree high power pulse
531 ;p12: f1 channel - 180 degree shaped pulse
532 ;p16: homospoil/gradient pulse [1 msec]
533 ;d1 : relaxation delay; 1-5 * T1
534 ;d16: delay for homospoil/gradient recovery
535 ;cnst21: chemical shift for selective pulse (offset, in ppm)
536 ;ns: 2 * n, total number of scans: NS * TD0
537 ;ds: 4
538 ;cpd2: decoupling according to sequence defined by cpdprg2
539 ;pcpd2: f2 channel - 90 degree pulse for decoupling sequence
540
541 ;phcor 2 : phasedifference between power levels sp1 and p11
542
543 ;choose p12 according to desired selectivity
544 ;the flip-angle is determined by the amplitude
545 ;set O1 on resonance on the multiplet to be excited or use spoffs
546
547 ;use gradient ratio: gp 16
548 ; 15
549
550 ;for z-only gradients:
551 ;gpz1: 16% (for selectivity)
552 ;gpz2: 45%
553
554 ;use gradient files:
555 ;gpnam1: SMSQ10.100
556
557 ;preprocessor-flags-start
558 ;CALC_SPOFFS: automatically calculate spoffs for selective pulses
559 ;start experiment with option -DCALC_SPOFFS (eda: ZGOPTNS)
560 ;FLAG_BLK: for BLKGRAD before d1 rather than go
561 ;option -DFLAG_BLK: (eda: ZGOPTNS)
562 ;preprocessor-flags-end
563
564 ;$Id: $
565
566 Pulse Programs for AVANCE systems running under Topspin version 3.x
567 “selgradgpse2d.ts3” for 19F NMR data acquisition with proton coupling
568 ;Based on selgpse
569 ;avance-version (21/09/15)
570 ;1D spin echo with gradients
571 ; using selective refocussing with a shaped pulse
572 ; in the presence of a gradient for slice selectivity
573 ; pseudo-2D for selecting two slices
574 ; use wavemaker to create the two pulses

```

```
575 ;
576 ;RSS 2025/2/23
577 ;uses wvm syntax rather than create_shape for compatibility with TS 3.7
578 ;
579 ;$CLASS=HighRes
580 ;$DIM=1D
581 ;$TYPE=
582 ;$SUBTYPE=
583 ;$COMMENT=
584
585
586 #include <Avance.incl>
587 #include <Delay.incl>
588 #include <Grad.incl>
589
590 "TAU1=de"
591 "TAU2=p1*2/PI"
592
593
594 # ifdef CALC_SPOFFS
595 "spoffs2=bf1*(cnst21/1000000)-o1"
596 # else
597 # endif /*CALC_SPOFFS*/
598
599 "l0=1"
600
601 "acqt0=0"
602 baseopt_echo
603
604
605 1 ze
606 2 30m
607
608 # ifdef FLAG_BLK
609 4u BLKGRAD
610 # else
611 4u
612 # endif /*FLAG_BLK*/
613
614 d1 p11:f1
615 50u UNBLKGRAD
616
617 p1 ph1
618 TAU1
619 p16:gp2
620 d16
621 5u gron1
622 if "l0 %2 == 1"
623 {
624   p12:sp2:f1 ph2:r
625 }
626 else
627 {
628   p12:sp3:f1 ph2:r
629 }
```

```

630 5u groff
631 p16:gp2
632 d16
633
634 # ifdef FLAG_BLK
635 TAU2
636 # else
637 TAU2 BLKGRAD
638 # endif /*FLAG_BLK*/
639
640 go=2 ph31
641 30m mc #0 to 2 F1QF(calclc(l0,1))
642
643 # ifdef FLAG_BLK
644 4u BLKGRAD
645 # else
646 4u
647 # endif /*FLAG_BLK*/
648
649 exit
650
651 ph1=0 0 3 3 2 2 1 1
652 ph2=1 3
653 ph31=0 0 1 1 2 2 3 3
654
655 ;p1 : f1 channel - power level for pulse (default)
656 ;sp2: f1 channel - shaped pulse for first frequency offset
657 ;sp3: f1 channel - shaped pulse for second frequency offset
658 ;p1 : f1 channel - 90 degree high power pulse
659 ;p12: f1 channel - 180 degree shaped pulse
660 ;p16: homospoil/gradient pulse [1 msec]
661 ;d1 : relaxation delay; 1-5 * T1
662 ;d16: delay for homospoil/gradient recovery
663 ;cnst21: chemical shift for selective pulse (offset, in ppm)
664 ;ns: 2 * n, total number of scans: NS * TD0
665 ;ds: 4
666
667 ;phcor 2 : phasedifference between power levels sp1 and p11
668
669 ;choose p12 according to desired selectivity
670 ;the flip-angle is determined by the amplitude
671 ;set O1 on resonance on the multiplet to be excited or use spoffs
672
673 ;use gradient ratio: gp 15
674 ; 45
675
676 ;for z-only gradients:
677 ;gpz1: 16% (for selectivity)
678 ;gpz2: 45%
679
680 ;use gradient files:
681 ;gpnam1: SMSQ10.100
682
683
684

```

```

685 ;preprocessor-flags-start
686 ;CALC_SPOFFS: automatically calculate spooffs for selective pulses
687 ;start experiment with option -DCALC_SPOFFS (eda: ZGOPTNS)
688 ;FLAG_BLK: for BLKGRAD before d1 rather than go
689 ;option -DFLAG_BLK: (eda: ZGOPTNS)
690 ;preprocessor-flags-end
691
692 ;WaveMaker shapes (optional)
693 ;use 'wvm -a' command to create the necessary shape files
694 ;sp2:wvm: rsnob(6000 Hz, cnst52 ppm; ss=10 us)
695 ;sp3:wvm: rsnob(6000 Hz, cnst53 ppm; ss=10 us)
696 ;cnst52: offset for pulse at +60 defined by au_wvm.selecho and hard coded
697 ;cnst53: offset for pulse at -60 defined by au_wvm.selecho and hard coded
698
699 ;$Id: $
700

701 "selgradgpigse2d.ts3" for  $^{19}\text{F}$ - $\{^1\text{H}\}$  NMR data acquisition with proton decoupling

702 ;Based on selgpse
703 ;avance-version (21/09/15)
704 ;1D spin echo with gradients
705 ; using selective refocussing with a shaped pulse
706 ; in the presence of a gradient for slice selectivity
707 ; pseudo-2D for selecting two slices
708 ; use wavemaker to create the two pulses
709 ;with decoupling
710 ;RSS 2025/2/23
711 ;uses wvm syntax rather than create_shape for compatibility with TS 3.7
712 ;
713 ;$CLASS=HighRes
714 ;$DIM=1D
715 ;$TYPE=
716 ;$SUBTYPE=
717 ;$COMMENT=
718
719 #include <Avance.incl>
720 #include <Delay.incl>
721 #include <Grad.incl>
722
723 "TAU1=de"
724 "TAU2=p1*2/PI"
725
726 # ifdef CALC_SPOFFS
727 "spoffs2=bf1*(cnst21/1000000)-o1"
728 # else
729 # endif /*CALC_SPOFFS*/
730
731 "l0=1"
732 "d11=30m"
733
734 "acqt0=0"

```

```
735 baseopt_echo
736
737 1 ze
738   d11 pl12:f2
739 2 30m do:f2
740
741 # ifdef FLAG_BLK
742   4u BLKGRAD
743 # else
744   4u
745 # endif /*FLAG_BLK*/
746
747   d1 pl1:f1
748   50u UNBLKGRAD
749
750   p1 ph1
751   TAU1
752   p16:gp2
753   d16
754   5u gron1
755   if "I0 %2 == 1"
756   {
757     p12:sp2:f1 ph2:r
758   }
759   else
760   {
761     p12:sp3:f1 ph2:r
762   }
763   5u groff
764   p16:gp2
765   d16
766
767 # ifdef FLAG_BLK
768   TAU2
769 # else
770   TAU2 BLKGRAD
771 # endif /*FLAG_BLK*/
772
773   go=2 ph31 cpd2:f2
774   30m do:f2 mc #0 to 2 F1QF(calclc(I0,1))
775
776 # ifdef FLAG_BLK
777   4u BLKGRAD
778 # else
779   4u
780 # endif /*FLAG_BLK*/
781
782 exit
783
784
785 ph1=0 0 3 3 2 2 1 1
```



```

786 ph2=1 3
787 ph31=0 0 1 1 2 2 3 3
788
789
790 ;pl1 : f1 channel - power level for pulse (default)
791 ;pl12: f2 channel - power level for CPD/BB decoupling
792 ;sp2: f1 channel - shaped pulse for first offset frequency
793 ;sp3: f1 channel – shaped pulse for second offset frequency
794 ;p1 : f1 channel - 90 degree high power pulse
795 ;p12: f1 channel - 180 degree shaped pulse
796 ;p16: homospoil/gradient pulse [1 msec]
797 ;d1 : relaxation delay; 1-5 * T1
798 ;d16: delay for homospoil/gradient recovery
799 ;cnst21: chemical shift for selective pulse (offset, in ppm)
800 ;ns: 2 * n, total number of scans: NS * TD0
801 ;ds: 4
802 ;cpd2: decoupling according to sequence defined by cpdprg2
803 ;pcpd2: f2 channel - 90 degree pulse for decoupling sequence
804
805 ;phcor 2 : phasedifference between power levels sp1 and pl1
806
807 ;choose p12 according to desired selectivity
808 ;the flip-angle is determined by the amplitude
809 ;set O1 on resonance on the multiplet to be excited or use spoofs
810
811 ;use gradient ratio: gp 16
812 ; 45
813
814 ;for z-only gradients:
815 ;gpz1: 16% (for selectivity)
816 ;gpz2: 45%
817
818 ;use gradient files:
819 ;gpnam1: SMSQ10.100
820
821 ;preprocessor-flags-start
822 ;CALC_SPOFFS: automatically calculate spoofs for selective pulses
823 ;start experiment with option -DCALC_SPOFFS (eda: ZGOPTNS)
824 ;FLAG_BLK: for BLKGRAD before d1 rather than go
825 ;option -DFLAG_BLK: (eda: ZGOPTNS)
826 ;preprocessor-flags-end
827
828 ;WaveMaker shapes (optional)
829 ;use 'wvm -a' command to create the necessary shape files
830 ;sp2:wvm: rsnob(6000 Hz, cnst52 ppm; ss=10 us)
831 ;sp3:wvm: rsnob(6000 Hz, cnst53 ppm; ss=10 us)
832 ;cnst52: offset for pulse at +60 defined by au_wvm.selecho and hard coded
833 ;cnst53: offset for pulse at -60 define by au_wvm.selecho and hard coded
834
835 ;$ld: $
836

```

837

## 838 2.0 References

---

1. S. Purser, P. R. Moore, S. Swallow and V. Gouverneur, *Chem. Soc. Rev.*, doi = 10.1039/B610213C, **37**(2), 320-330
2. B. Linclau, Z. Wang, G. Compain, V. Paumelle, C. Q., *Angew. Chem. Int. Ed.*, 2016, doi = 10.1002/anie.201509460, 55, 674-678.
3. T. Fujita, J. Iwasa and C. Hansch, *J. Am. Chem. Soc.*, 1964, **86**(23), 5175-5180.
4. D. E. Leahy, J. J. Morris, P. J. Taylor and A. R. Wait, *J. Chem. Soc. Perkin Trans. 2*, 1992, **4**, 723-731.
5. C. M. Ellison, M. T.D Cronin, J. C. Madden and T. W. Schultz, *SAR and QSAR in Environmental Research*, 2008, **7-8**, 751-783.
6. Y. Ben-Tal and J. E. Hein, *J. Org. Chem.*, 2025, doi = 10.1021/acs.joc.5c00717, 90, 23, 7832–7840.
7. Y. N. Mitrev, *Bulg. Chem. Comm.* 2017, **49**(Special Issue F), 64-69.
